1 *Type of the Paper (Article)*

2 **Molecular Insights of  $\beta$ -Lactamics Resistance *Klebsiella pneumoniae* Isolates with**  
3 **Focus on Multidrug Resistance and Virulence from Colonization Samples**

4

5 Lavouisier F.B. Nogueira#, Marília S. Maia#, Marco A.F. Clementino#, Ila F.N. Lima, Jorge L.N.

6 Rodrigues, Luciana V.C. Fragoso, Glairta S. Costa, Jose Q.S. Filho, Alexandre Havt, Deiziane

7 V.S. Costa, Lyvia M.V.C. Magalhães, Dilza Silva, Nicholas E. Sherman, José K. Sousa\* and

8 Aldo A.M. Lima\*

9 # - These authors contributed equally to this work.

10 \* - Corresponding authors.

11 **Abstract:** *Klebsiella pneumoniae* is associated with high resistance to antimicrobials and  
12 is common in isolates from colonization and nosocomial infections. This study aims to  
13 develop assays to detect resistance genes belonging to the *bla* family and investigate  
14 metabolic pathways in resistant isolates of *K. pneumoniae*. The genes of the subfamilies  
15 included were: *bla*SHV, *bla*TEM, *bla*NDM, *bla*KPC, *bla*GES, *bla*CTX-M and relevant  
16 variants of the *bla*OXA subfamily. Mass spectrometry data were acquired on the  
17 Orbitrap IDX spectrometer (Thermo) connected to the Vanquish UPLC system. Isolates  
18 from 122 *K. pneumoniae* samples were collected from 04/23/2019 to 05/29/2021. A high  
19 prevalence of resistance to penicillins, cephalosporins and carbapenems was found  
20 among the isolates. The identified genotypic profile showed a high prevalence of genes  
21 belonging to Ambler's classes of beta-lactamases A, B and D. In the metabolomic study,  
22 the N-fructosyl isoleucine metabolite was identified increased in multidrug-resistant  
23 (MDR) strains of *K. pneumoniae* compared to strains susceptible to antimicrobials. In

24 conclusion, the assays developed were efficient in detecting the main genes of the *bla*  
25 family of resistance in *K. pneumoniae*. The use of the pentose phosphate metabolic  
26 pathway suggests a beneficial regulation of bacterial growth, and colonization in MDR *K.*  
27 *pneumoniae* strains, which may indicate the use of this pathway as a virulence  
28 mechanism in resistant strains.

29 **KEYWORDS:** Antimicrobial resistance; multidrug-resistant;  $\beta$ -lactamases; qPCR;  
30 molecular diagnosis; *Klebsiella pneumoniae*.

## 31 INTRODUCTION

32 Bacterial resistance to antimicrobial agents is a global public health problem  
33 that leads to an increase in the cost of treatment, length of stay, morbidity and  
34 mortality of hospitalized patients, especially in intensive care units (ICU).<sup>1,2</sup> In this  
35 sense, understanding the emergency mechanisms of regulation and dissemination of  
36 resistance to antimicrobial agents in the pathogenesis of bacterial colonization and/or  
37 infection can be of critical importance in preventing and controlling this problem.

38 *Klebsiella pneumoniae* is a Gram-negative  $\gamma$ -proteobacteria bacteria, belonging to  
39 the *Enterobacteriaceae* family, and is generally viewed as an opportunistic  
40 microorganism, carrying several virulence factors and capable of accumulating  
41 resistance genes to various classes of antimicrobials. It is commonly related to cases of  
42 colonization and/or healthcare-associated infections (HAIs), and has been identified as  
43 an etiological agent in pneumonia, urinary tract infections (UTI), soft tissue and  
44 surgical wound infections, bacteremia, and sepsis.<sup>3</sup>

45 It is estimated that *K. pneumoniae* is responsible for approximately 10% of all  
46 cases of HAIs, and of these, 32.8% are caused by strains resistant to multiple

47 antimicrobial drugs. However, studies indicate that the rate of isolated strains  
48 presenting resistance to antimicrobials has increased over the years.<sup>4,5</sup>

49 *K. pneumoniae* has been associated with the ability to overcome colonization  
50 resistance imposed by the gastrointestinal microbiota<sup>6</sup> and has been reported as an  
51 emerging Multidrug-Resistant microorganism of emergency priority by the World  
52 Health Organization (WHO) for the development of new therapies.<sup>7</sup> Epidemiological  
53 data have demonstrated that *K. pneumoniae* can translocate from the gastrointestinal  
54 tract to other sterile sites of the same host or other patients through the fecal-oral route.  
55 What makes clear the clinical relevance of this microorganism. <sup>8</sup>

56 One of the most likely causes of the increasingly frequent emergence of  
57 bacterial strains resistant to one or more antibiotics is the excessive and sometimes  
58 incorrect use of antimicrobials. The relatively long time required to identify the  
59 pathogen by traditional methods, as well as for the results of the antimicrobial  
60 susceptibility test (AST), forces the clinician to use broad-spectrum drugs empirically,  
61 increasing selective pressure, which ends up benefiting pathogens genetically capable  
62 of adapting to the adverse environment.<sup>1,9</sup>

63 Possible answers to reduce the time needed to obtain a resistance profile, and to  
64 investigate new approaches in treatment, is the development of molecular  
65 methodologies, that can make the identification of resistance faster, and also be more  
66 sensitive than the traditional methodologies.<sup>10</sup> And the investigation of metabolic  
67 differences between sensitive and resistant strains, that can lead to metabolites or  
68 pathways that can be used as targets for the development of new treatments and  
69 strategies for dealing with multidrug-resistant (MDR) microorganisms. <sup>11-12</sup>

70 Beta-lactams are the class of antimicrobials most affected by resistance in  
71 general, which is conferred in gram-negatives, mainly by the *bla* gene family, this  
72 group of genes encodes enzymes called beta-lactamases, which are capable of  
73 neutralizing the action of beta-lactams through hydrolysis of the beta-lactam ring.<sup>13-15</sup>

74 In this study it was investigated the phenotype of resistance, the genotypic  
75 profile of the *bla* family of  $\beta$ -lactamases, and the metabolic differences between  
76 sensitive and MDR *K. pneumoniae* strains, isolated from patients admitted to the ICU in  
77 a university hospital in the city of Fortaleza-CE, Brazil.

78 We aim to develop a molecular assay, capable of identifying all variants of the  
79 most relevant genes of the *bla* family, these being: *bla*SHV, *bla*TEM, *bla*NDM, *bla*KPC,  
80 *bla*GES and *bla*CTX-M. In addition, also was included the most epidemiologically  
81 relevant variants of the *bla*-OXA subfamily. Thus, creating a set of primers capable of  
82 detecting the presence of hundreds of resistance genes with a reduced number of  
83 reactions. Were also investigated the main differences between the metabolites up and  
84 down regulated in sensitive and MDR strains of *K. pneumoniae*, both from the  
85 intracellular medium and the supernatant among themselves and in comparison, with  
86 the control medium.

## 87 RESULTS

88 **Selection of bacterial samples.** A total of 249 samples of Gram-negative  
89 bacteria resistant to beta lactam antimicrobials were collected from 04/23/2019 to  
90 05/29/2021, those were identified, and the most prevalent microorganism found was  
91 *Klebsiella pneumoniae* 48.99% (122/249).

92 Identification of the phenotypic profile of beta-lactams resistance of *K.*  
93 *pneumoniae* strains. The bacteria isolates included in the study were tested against a  
94 wide range of beta-lactams drugs, and the presence of a high percentage of isolates  
95 resistant to these drugs was verified, which included Penicillins: ampicillin/sulbactam  
96 (92.00%) and piperacillin/tazobactam (88.46%), Cephalosporins: cefepime (83.02%),  
97 cefoxitin (73.68%), ceftazidime (86.54%), ceftazidime/avibactam (11.76%), ceftriaxone  
98 (83.02%), cefuroxime (90.38%) and cefuroxime axetil (81.82%) and Carbapenems:  
99 ertapenem (44.00%), imipenem (71.70%) and meropenem (69.81%), as shown in Figure  
100 1.

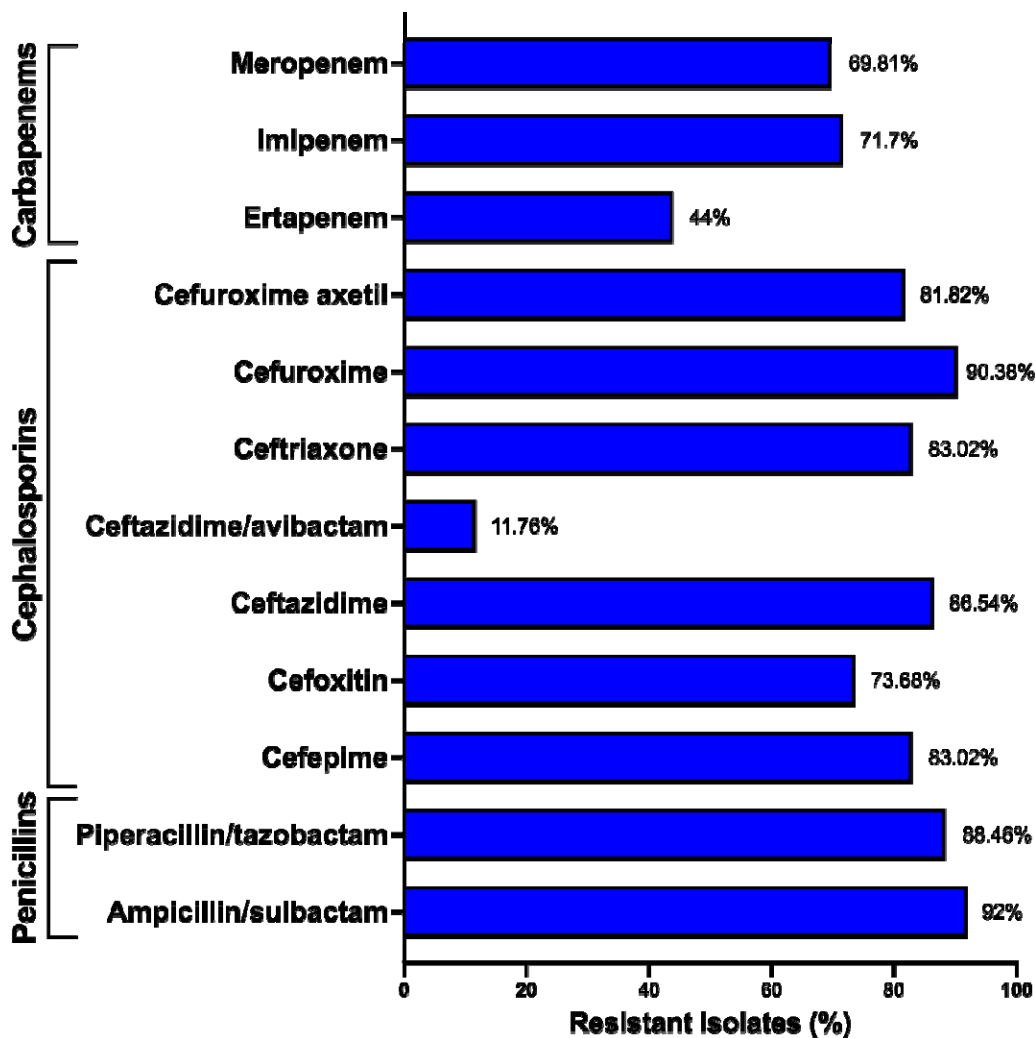

102 **Figure 1.** Prevalence of *K. pneumoniae* isolates resistant to the beta-lactams evaluated  
103 (Penicillins, Cephalosporins and Carbapenems), demonstrating a phenotypic profile of  
104 resistance to multiple beta-lactams drugs, in approximately 70% of the isolates, with  
105 the exception of ceftazidime/avibactam and ertapenem.

106 **Primers design.** After selection on the platforms: Comprehensive Antibiotic  
107 Resistance Data-base (CARD) and National Center for Biotechnology and Information  
108 (NCBI, USA), and subsequent compilation and analysis of FASTA sequences, it was  
109 possible to identify consensus sequences common to all sequences available in the  
110 databases for each of the genes included in the study: *blaSHV* (N = 156), *blaTEM* (N =  
111 167), *blaNDM* (N = 27), *blaKPC* (N = 208), *blaGES* (N = 25), and *blaCTX-M* (N = 144).  
112 Except for the *blaOXA* gene, for which the most clinically relevant sequences were used  
113 (N = 203).

114 The *blaCTX-M* and *blaOXA* genes, due to its diversity and high degree of  
115 genetic variation between homologous sequences, were grouped into clades, and  
116 divided into groups. the *blaCTX-M* gene group was named according to the  
117 international standardization for this gene with the CTX-M 1like been divided into two  
118 groups due to its high number or sequences and the genetic variation between them.  
119 CTX-M 1.1like (N = 42), CTX-M 1.2like (N = 16), CTX-M 2like (N = 23), CTX-M 8like (N =  
120 14) and CTX-M 9like (N = 49), while the *blaOXA* gene was divided into the OXA-23like  
121 (N = 25 ), OXA-24/40like (N = 8), OXA-48like (N = 17) and OXA-51like (N = 153), as can  
122 be seen in **Figures 2** and **3**.

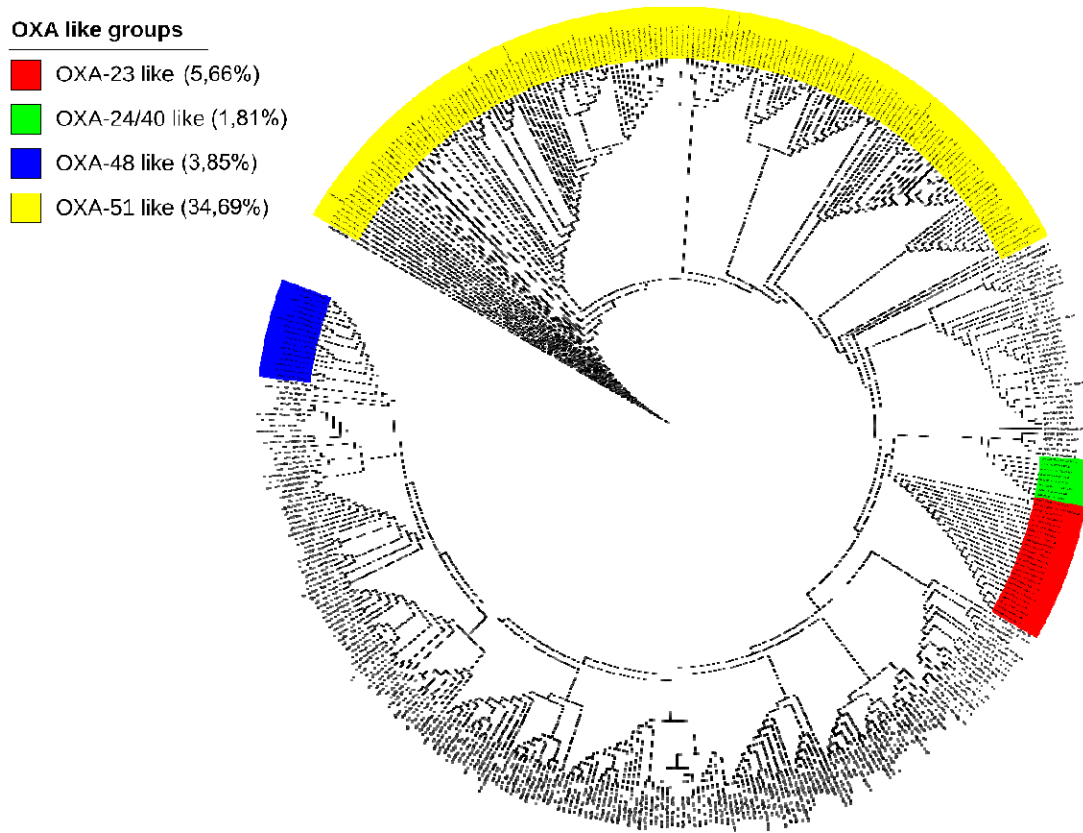

123

124 **Figure 2.** Cladogram of the *blaOXA* subfamily showing the most epidemiologically  
125 relevant groups, covered by the primers developed, and the percentage of sequences  
126 identifiable by each primer in comparison with the total number of the *blaOXA* family  
127 (N = 441) at the time of publication of this work.

128

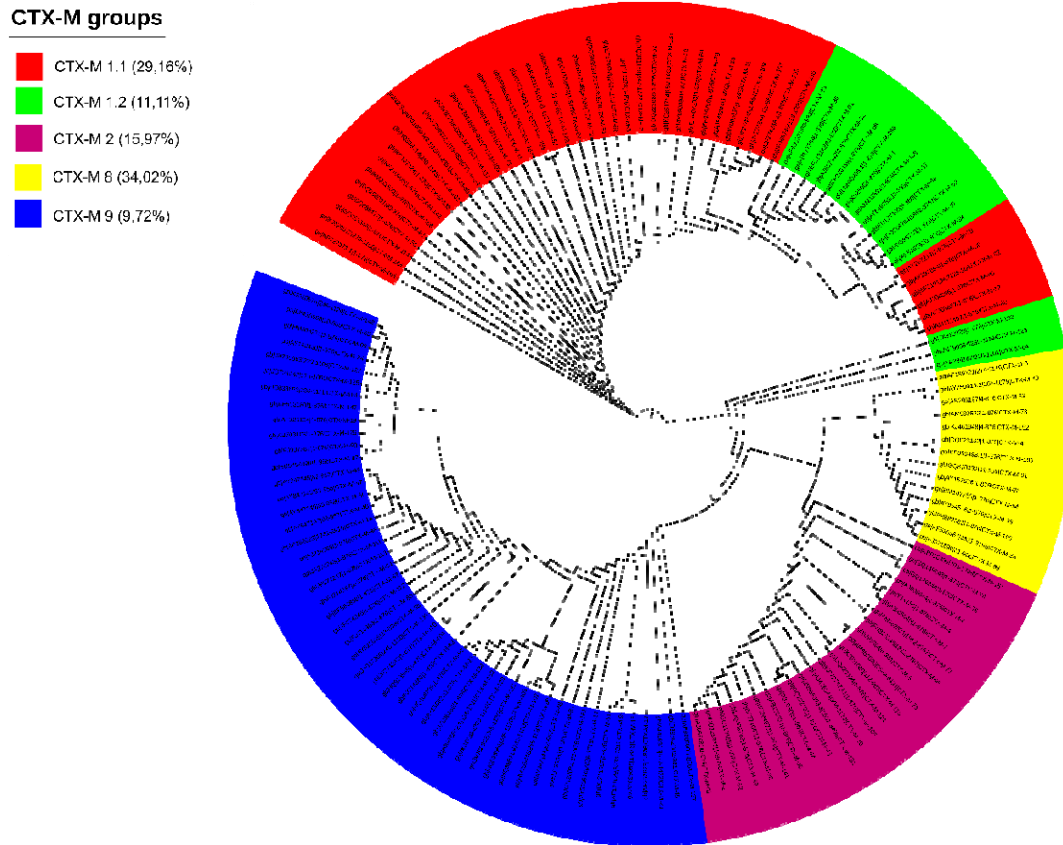

129

130 **Figure 3.** Cladogram with all sequences from the *bla*CTX-M subfamily divided into  
131 groups, illustrating the identifiable sequences, and the percentage of sequences  
132 detectable by each primer in comparison with the total number of the *bla*CTX-M family  
133 (N = 144) until the time of publication of this work.

134 A total of 14 pairs of primers were developed, which together have the capacity  
135 to detect 929 variants of resistance genes belonging to the *bla* gene family. The primer  
136 sequences for genes with conserved and non-conserved sequences can be found in  
137 **Tables 1 and 2**, respectively.

138

139

140

141



142

**Table 1.** Primer sequences for conserved genes

| Name of gene  | Number of variations detectable | Primer name | Sequence                | Primer size |
|---------------|---------------------------------|-------------|-------------------------|-------------|
| <i>blaSHV</i> | 156                             | SHV-F       | ATTATCTCCCTGTTAGCCACCC  | 22          |
|               |                                 | SHV-R       | GTTTAAATTTGCTCAAGCGGCTG | 22          |
| <i>blaTEM</i> | 167                             | TEM-F       | ACCCAGAAACGCTGGTGAAA    | 20          |
|               |                                 | TEM-R       | GGGGCGAAAACCTCTCAAGGA   | 20          |
| <i>blaNDM</i> | 27                              | NDM-F       | GAAGCTGAGCACCGCATTAG    | 20          |
|               |                                 | NDM-R       | CCATTTGCTGGCCAATCGTC    | 20          |
| <i>blaKPC</i> | 208                             | KPC-F       | TCGCGGAACCATTTCGCTAAA   | 20          |
|               |                                 | KPC-R       | GAATGAGCTGCACAGTGGGA    | 20          |
| <i>blaGES</i> | 25                              | GES-F       | GCCCAGGAGAGAGATTACGC    | 20          |
|               |                                 | GES-R       | CTGACCGACAGAGGCAACT     | 20          |

143

144

145

**Table 2.** Primer sequences for non-conserved genes, divided into clades.

| Name of gene            | Number of variations detectable | Primer name | Sequence             | Primer size |
|-------------------------|---------------------------------|-------------|----------------------|-------------|
| <i>blaCTX-M 1.1like</i> | 42                              | CTXM1.1L-F  | GATTGCGGAAAAGCACGTCA | 20          |
|                         |                                 | CTXM1.1L-R  | TTCATCGCCACGTTATCGCT | 20          |
| <i>blaCTX-M 1.2like</i> | 16                              | CTXM1.2L-F  | CGCCGCTGATTCTGGTCA   | 18          |
|                         |                                 | CTXM1.2L-R  | TGACGATTTTAGCCGCCGAC | 20          |

|                          |     |             |                       |    |
|--------------------------|-----|-------------|-----------------------|----|
| <i>bla</i> CTX-M 2like   | 23  | CTXM2L-F    | ATGGCGCAGACCCTGAAAAA  | 20 |
|                          |     | CTXM2L-R    | CTGCCGGTTTTATCGCCA    | 19 |
| <i>bla</i> CTX-M 8like   | 14  | CTXM8L-F    | CGCTCAACACCGCGATCC    | 18 |
|                          |     | CTXM8L-R    | ATCCCCGACAACCCACGAT   | 19 |
| <i>bla</i> CTX-M 9like   | 49  | CTXM9L-F    | CGTGGCTCAAAGGCAATACG  | 20 |
|                          |     | CTXM9L-R    | TCTGTTGCGGCTGGGTAAAA  | 20 |
| <i>bla</i> OXA-23like    | 24  | OXA23L-F    | GCTCTAAGCCGCGCAAATAC  | 20 |
|                          |     | OXA23L-R    | TGACCTTTTCTCGCCCTTCC  | 20 |
| <i>bla</i> OXA-24/40like | 8   | OXA24/40L-F | TGCCGATGACCTTGCACATA  | 20 |
|                          |     | OXA24/40L-R | CCATTAGCTTGCTCCACCCA  | 20 |
| <i>bla</i> OXA-48like    | 17  | OXA48L-F    | TGGTAGCAAAGGAATGGCAAG | 21 |
|                          |     | OXA48L-R    | GGGCGATCAAGCTATTGGGA  | 20 |
| <i>bla</i> OXA-51like    | 153 | OXA51L-F    | GATCGGCCTTGAGCACCATA  | 20 |
|                          |     | OXA51L-R    | GCCATAACCAACACGCTTCA  | 20 |

146

147 ***In silico* primers validation.** The parameters obtained for each primer after  
 148 analysis using the Primer-BLAST® (NCBI, USA) and Sequence Manipulation Suite  
 149 (SMS): PCR Primer Stats software are available in **Table 3**.

150 **Table 3.** Parameters obtained by *in silico* validation of the developed primers.

| Gene           | Primer name | Tm (C°) | GC%  | Self complementarity | Self 3' complementarity | Product length |
|----------------|-------------|---------|------|----------------------|-------------------------|----------------|
| <i>bla</i> SHV | SHV-F       | 59,2    | 50,0 | 3                    | 0                       | 70             |
|                | SHV-R       | 59,3    | 45,4 | 5                    | 3                       |                |
| <i>bla</i> TEM | TEM-F       | 60,1    | 50,0 | 4                    | 0                       | 110            |

It is made available under a [CC-BY-ND 4.0 International license](https://creativecommons.org/licenses/by-nd/4.0/) .

|                                  |             |      |      |   |   |     |
|----------------------------------|-------------|------|------|---|---|-----|
|                                  | TEM-R       | 59,9 | 55,0 | 2 | 1 |     |
| <i>bla</i> NDM                   | NDM-F       | 59,3 | 55,0 | 5 | 1 | 86  |
|                                  | NDM-R       | 60,1 | 55,0 | 6 | 2 |     |
| <i>bla</i> KPC                   | KPC-F       | 60,3 | 50,0 | 4 | 2 | 128 |
|                                  | KPC-R       | 60,3 | 55,0 | 5 | 1 |     |
| <i>bla</i> GES                   | GES-F       | 59,9 | 60,0 | 3 | 2 | 94  |
|                                  | GES-R       | 59,9 | 55,0 | 3 | 2 |     |
| <i>bla</i> CTX-M 1.1 <i>like</i> | CTXM1.1L-F  | 59,7 | 50,0 | 4 | 1 | 87  |
|                                  | CTXM1.1L-R  | 60,1 | 50,0 | 4 | 2 |     |
| <i>bla</i> CTX-M 1.2 <i>like</i> | CTXM1.2L-F  | 60,1 | 61,1 | 3 | 2 | 90  |
|                                  | CTXM1.2L-R  | 61,0 | 55,0 | 3 | 3 |     |
| <i>bla</i> CTX-M 2 <i>like</i>   | CTXM2L-F    | 60,5 | 50,0 | 4 | 0 | 155 |
|                                  | CTXM2L-R    | 60,7 | 57,8 | 4 | 1 |     |
| <i>bla</i> CTX-M 8 <i>like</i>   | CTXM8L-F    | 61,5 | 66,6 | 4 | 2 | 197 |
|                                  | CTXM8L-R    | 60,9 | 57,8 | 3 | 2 |     |
| <i>bla</i> CTX-M 9 <i>like</i>   | CTXM9L-F    | 59,9 | 55,0 | 3 | 2 | 180 |
|                                  | CTXM9L-R    | 60,1 | 50,0 | 3 | 0 |     |
| <i>bla</i> OXA-23 <i>like</i>    | OXA23L-F    | 60,0 | 55,0 | 4 | 0 | 129 |
|                                  | OXA23L-R    | 59,9 | 55,0 | 2 | 0 |     |
| <i>bla</i> OXA-24/40 <i>like</i> | OXA24/40L-F | 59,7 | 50,0 | 4 | 2 | 177 |
|                                  | OXA24/40L-R | 60,0 | 55,0 | 4 | 0 |     |
| <i>bla</i> OXA-48 <i>like</i>    | OXA48L-F    | 59,8 | 52,3 | 3 | 0 | 183 |
|                                  | OXA48L-R    | 59,8 | 55,0 | 4 | 0 |     |
| <i>bla</i> OXA-51 <i>like</i>    | OXA51L-F    | 59,8 | 55,0 | 4 | 2 | 199 |
|                                  | OXA51L-R    | 59,1 | 50,0 | 2 | 1 |     |

151

152           **Testing, optimization, and standardization of *in vitro* reactions.** All primers  
153 were tested using positive controls developed *in house*, and it was possible to verify  
154 that the ideal annealing temperature ( $T_a$ ) for the developed primer pairs was 61°C,  
155 except for the primer referring to the *bla*NDM gene, for which the ideal  $T_a$  was 64°C.  
156 The reactions were then evaluated for their specificity and stability by checking the  
157 Melting temperature ( $T_m$ ). The melting curves are available in the supplementary  
158 material **Figure S1**.

159           **Efficiency curve** It was found that all tested primers presented an efficiency  
160 rate  $\geq 93.21$  and  $\leq 101.28\%$ ,  $R^2 \geq 0.99$ , and detection limit between  $\approx 2$  and  $\approx 13$  copies/ $\mu$ L as  
161 shown in **Table 4**.

162           **Table 4.** Results of the efficiency curves of the developed primers.

| Gene name                | Efficiency (%) | Correlation coefficient ( $R^2$ ) | Threshold | Detection limit (Copies/ $\mu$ L) | Melting Peak ( $T_m$ °C) |
|--------------------------|----------------|-----------------------------------|-----------|-----------------------------------|--------------------------|
| <i>bla</i> SHV           | 96,15          | 0,992                             | 0,60      | $\approx 2$                       | 86,7                     |
| <i>bla</i> TEM           | 95,32          | 1,000                             | 0,70      | $\approx 2$                       | 81,5                     |
| <i>bla</i> NDM           | 99,90          | 0,999                             | 0,48      | $\approx 2$                       | 85,7                     |
| <i>bla</i> KPC           | 100,44         | 0,992                             | 0,24      | $\approx 2$                       | 85,7                     |
| <i>bla</i> GES           | 100,21         | 0,997                             | 0,27      | $\approx 2$                       | 81,7                     |
| <i>bla</i> CTX-M 1.1like | 95,75          | 0,999                             | 0,40      | $\approx 13$                      | 84,3                     |
| <i>bla</i> CTX-M 1.2like | 100,82         | 0,994                             | 0,32      | $\approx 13$                      | 83,2                     |
| <i>bla</i> CTX-M 2like   | 98,09          | 0,998                             | 0,30      | $\approx 2$                       | 86,4                     |
| <i>bla</i> CTX-M 8like   | 95,32          | 1,000                             | 0,10      | $\approx 13$                      | 88,4                     |
| <i>bla</i> CTX-M 9like   | 97,82          | 0,996                             | 0,10      | $\approx 2$                       | 89,0                     |

|                         |        |       |      |     |       |
|-------------------------|--------|-------|------|-----|-------|
| <i>blaOXA-23like</i>    | 99,51  | 1,000 | 0,15 | ≈2  | 78,4  |
| <i>blaOXA-24/40like</i> | 101,82 | 0,988 | 0,15 | ≈13 | 78,7  |
| <i>blaOXA-48like</i>    | 93,21  | 1,000 | 0,20 | ≈13 | 80,29 |
| <i>blaOXA-51like</i>    | 95,51  | 0,993 | 0,55 | ≈2  | 82,0  |

163

164

**Identification of the genetic resistance profile of *K. pneumoniae* isolates.** The

165

122 *K. pneumoniae* isolates were tested against the 14 pairs of primers developed, and it

166

was possible to verify a high prevalence of beta-lactam resistance genes among the

167

isolates analyzed. The most prevalent genes detected were, respectively: *blaKPC*

168

(95.90%); *blaSHV* (94.26%); *blaCTX-M 1.2like* (88.52%); *blaCTX-M 2like* (83.61%); *blaCTX-*

169

*M 1.1like* (80.33%); *blaTEM* (80.33%); *blaNDM* (33.61%); *blaOXA-23like* (28.69%); *blaGES*

170

(20.49%); *blaOXA-51like* (15.57%); *blaCTX-M 9like* (13.93%); *blaCTX-M 8like* (12.30%);

171

*blaOXA-24/40like* (11.48%) and *blaOXA-48like* (3.28%). The results can be seen in **Figure**

172

**4A**, grouped according to Ambler's classification.

173

It is important to note that not all variants of each group of genes analyzed

174

belong to a single class in the Ambler's classification, such as *blaTEM* and *blaSHV*

175

genes, where not all variants have activity as extended spectrum beta-lactamases

176

(ESBL) for example, however, due to the grouping of all sequences in a single primer,

177

the separation of these sequences into other groups would be impossible, so the

178

grouping of genes was carried out globally in a way that covered the mains

179

classification of the subfamily in question.

180

Through the data obtained by the qPCR reactions developed, it was also

181

possible to verify that the isolates analyzed during this study had the presence of

182 several genes belonging to the *bla* family accumulated, with values varying from 3 to  
183 12 of the tested genes, present per isolate, as shown in **Figure 4B**.

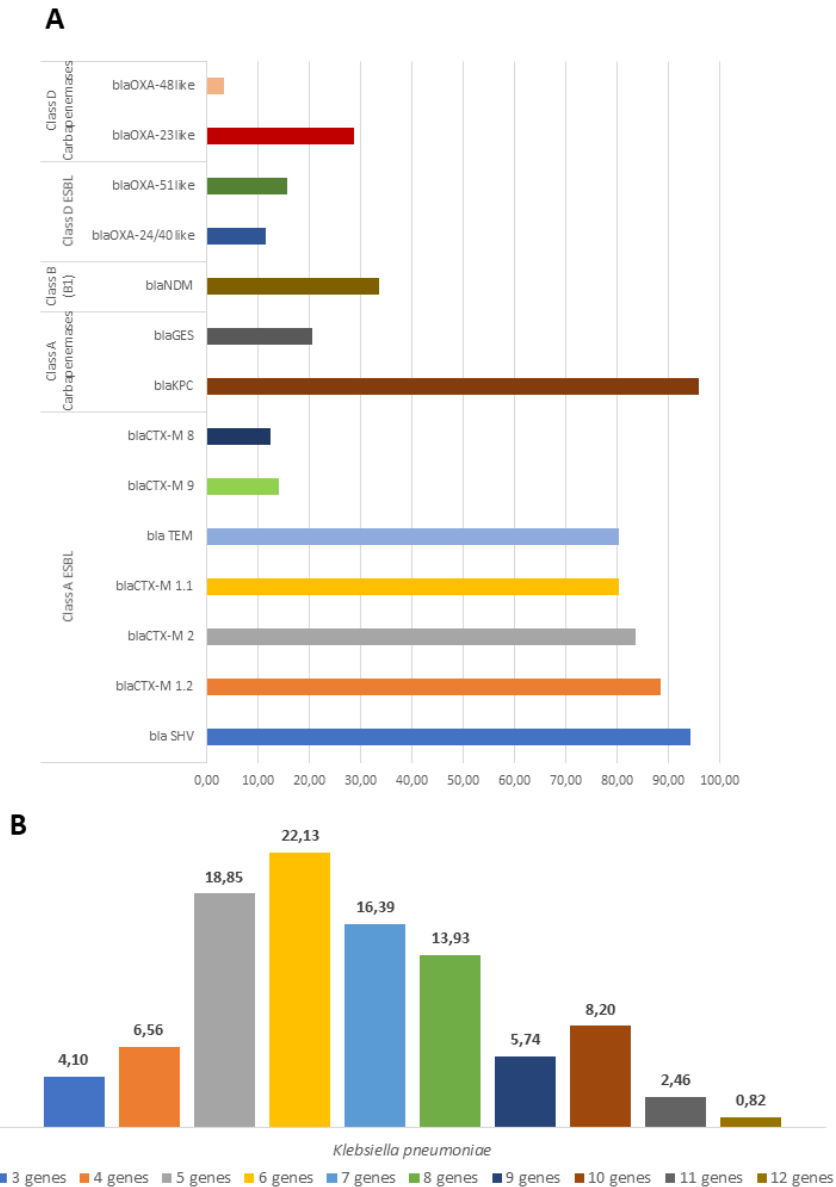

184

185 **Figure 4. (A)** Prevalence of beta-lactams resistance genes among the analyzed isolates,  
186 grouped according to the Ambler classification. **(B)** The percentage of *K. pneumoniae*  
187 isolates showing accumulation of genes encoding beta-lactamases belonging to the *bla*  
188 family.

189 **Comparisons of metabolomic profiles of *K. pneumoniae* isolates.** In total, 241  
190 metabolites were identified in positive mode and 116 metabolites identified in negative  
191 mode. Among these, 309 metabolites were identified by combining data from both  
192 acquisition modes (positive and negative) without redundancy. The principal  
193 component analysis (PCAs) and the heatmap analysis between the metabolites in  
194 supernatant of susceptible *K. pneumoniae* versus the control culture medium showed  
195 complete separation of the main vectors of the PCA plots and differential upregulation  
196 or downregulation between the two experimental groups (**Figure 5**). Among these  
197 metabolites, 25 were upregulated or downregulated. Interestingly, metabolites related  
198 to the synthesis of nitrogenous bases, protein synthesis and energy supply to the  
199 bacterial cell are significantly increased in supernatant derived from susceptible *K.*  
200 *pneumoniae* (**Figures S2, S3 and S4**). Similar findings were detected between MDR *K.*  
201 *pneumoniae* strains and control culture medium (**Figures S5, S6 and S7**).

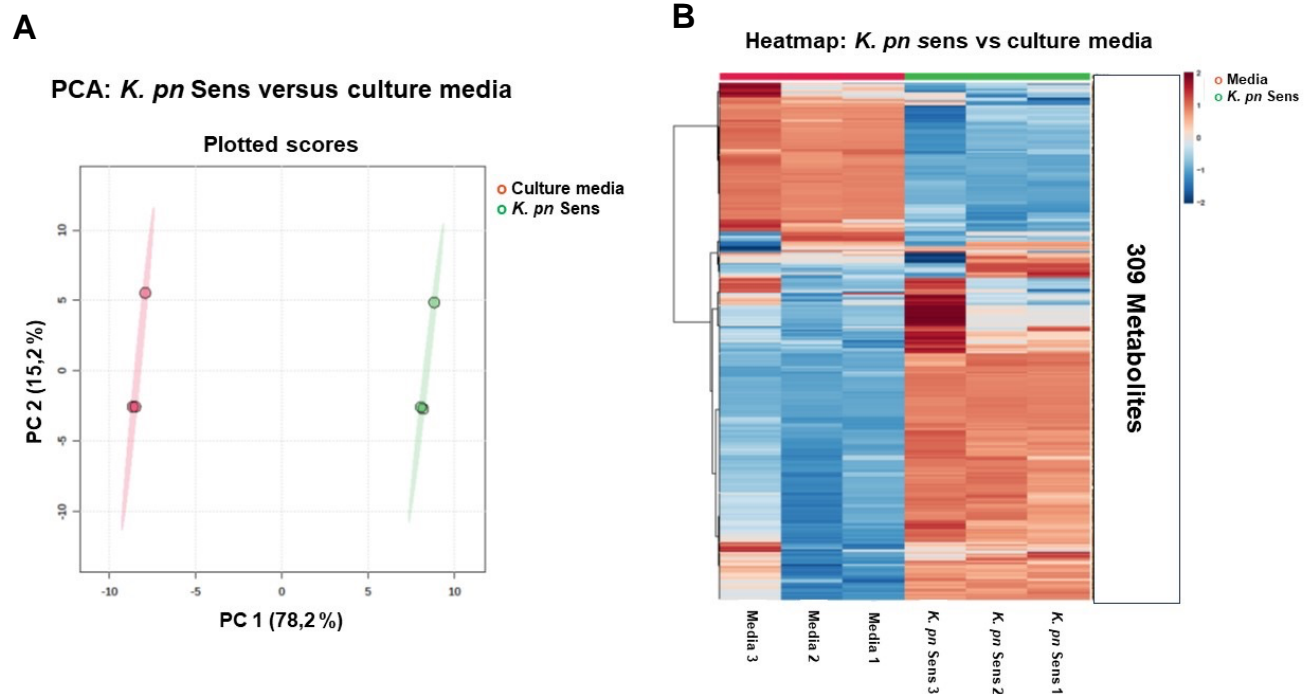

203 **Figure 5.** Comparison between susceptible *K. pneumoniae* supernatants (Sens) versus  
204 culture media. **(A)** Plot of the principal component analysis (PCAs) and **(B)** the  
205 heatmap of the comparison of metabolites between the supernatant of susceptible *K.*  
206 *pneumoniae* versus the control culture media.

207 The principal component analysis (PCAs) and the heatmap analysis of  
208 metabolites in supernatants from *K. pneumoniae* MDR versus susceptible isolates  
209 exhibited complete separation of the main vectors of the PCA plots (**Figure 6A**) and  
210 differences on levels of metabolites (**Figure 6B**). The analysis of deregulated  
211 metabolites between *K. pneumoniae* MDR versus susceptible isolates showed increased  
212 N-fructosyl isoleucine in the MDR *K. pneumoniae* isolates ( $p < 0.05$ , **Figure 6C**).

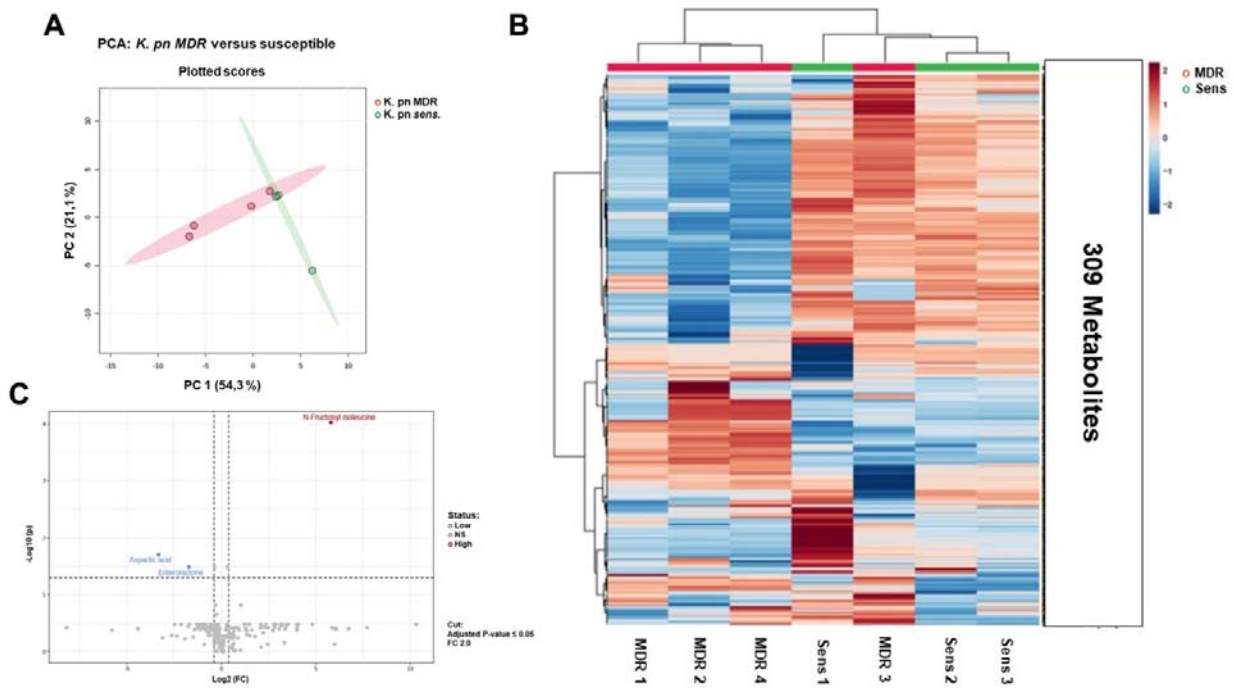

214 **Figure 6.** Comparison of supernatants from *K. pneumoniae* MDR versus susceptible  
215 (Sens). **(A)** Plots of the principal component analysis (PCAs) and **(B)** the heatmap of the  
216 comparison of metabolites between the supernatant of *K. pneumoniae* MDR versus



217 susceptible (Sens). (C) Plots of dysregulated metabolites between supernatants of *K.*  
218 *pneumoniae* MDR and susceptible.

219

220 Analysis of the intracellular metabolites of susceptible versus MDR *K.*

221 *pneumoniae* showed differences in the PCAs vectors (Figure 7A), heatmap (Figure 7B).

222 and increased N-fructosyl isoleucine levels in the MDR *K. pneumoniae* isolates ( $p < 0.05$ ,

223 Figure 7C). Figure 8 shows the PCAs and heatmap plots of supernatant from sensitive

224 and MDR *K. pneumoniae*.

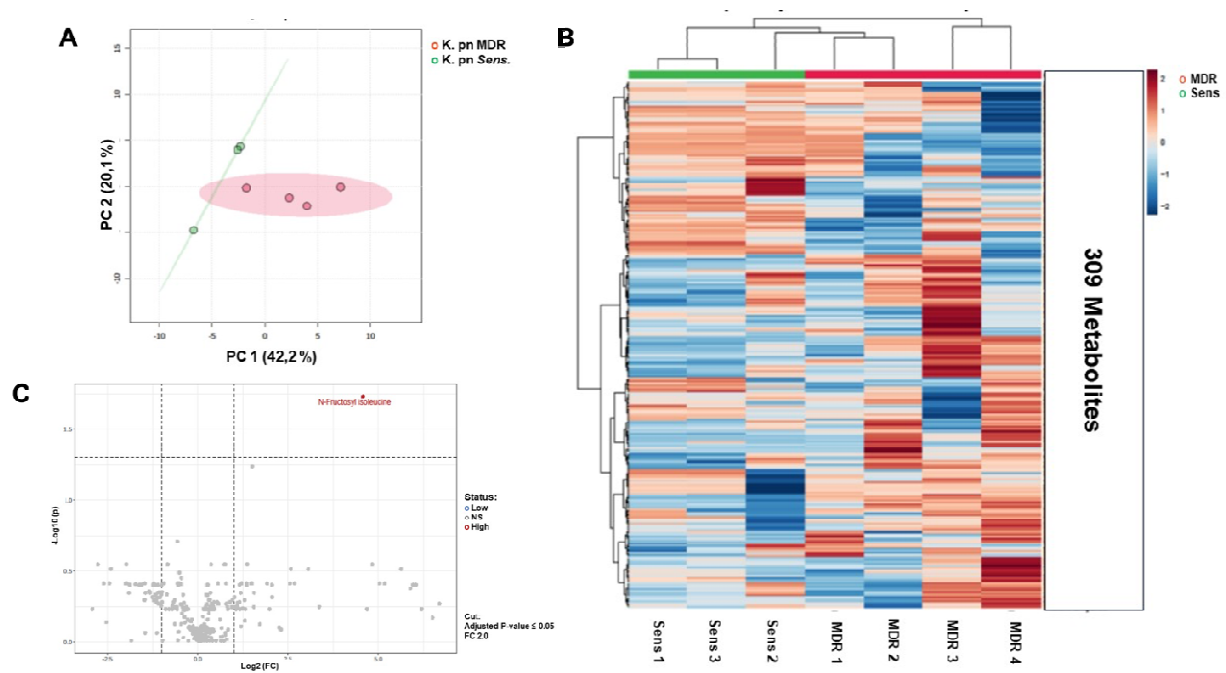

226 **Figure 7.** Comparison of Intracellular media of *K. pneumoniae* MDR versus susceptible

227 (Sens). (A) Principal Component Analysis (PCAs) plots and (B) Heatmap of the

228 Intracellular Environment of *K. pneumoniae* MDR and susceptible. (C) Plots of

229 dysregulated metabolites between the intracellular media of *K. pneumoniae* MDR and

230 susceptible.

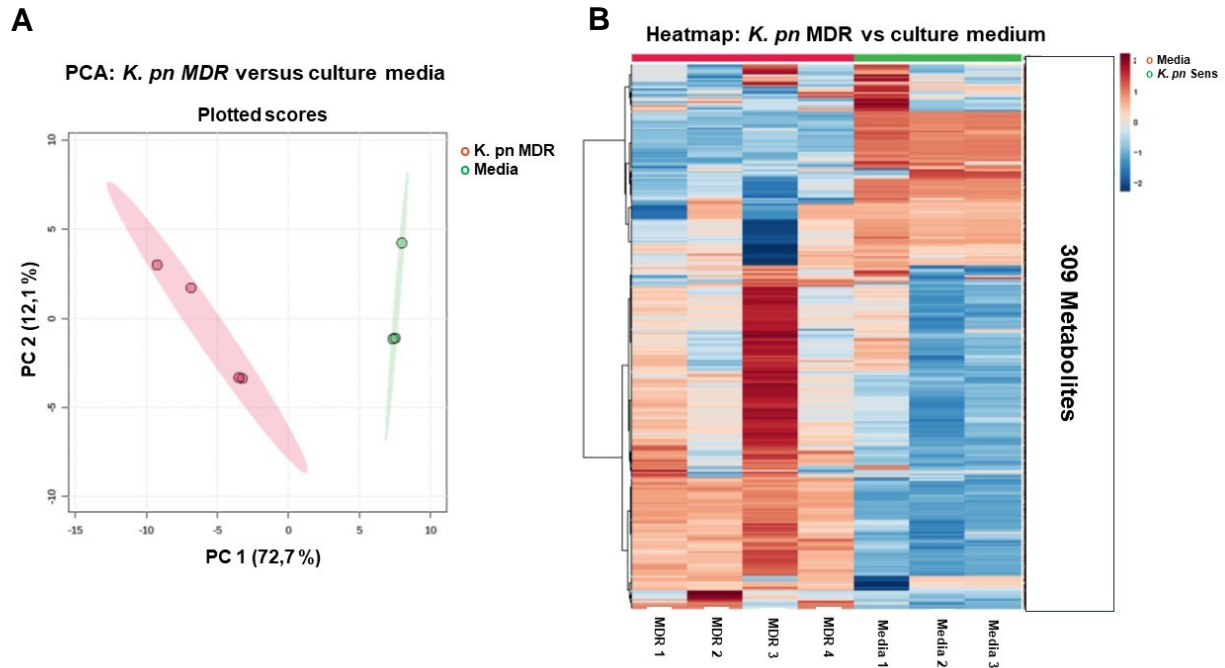

232 **Figure 8.** Comparison of *K. pneumoniae* Multidrug-Resistant (MDR) supernatants  
233 versus culture media. (A) Principal component analysis (PCAs) plots and (B) Heatmap  
234 of the supernatant of *K. pneumoniae* susceptible and MDR. Observe the separation of  
235 the main vectors of the (PCAs) plots and details of the differences in the heatmap  
236 between the two experimental groups.

## 237 DISCUSSION

238 During the period analyzed in the study, 249 bacterial isolates resistant to two  
239 or more class of antimicrobials used in TSA were identified. Of these resistant isolates,  
240 48.99% (122/249) belonged to the species *Klebsiella pneumoniae*, being this  
241 microorganism the most prevalent among those identified.

242 This data is consistent with what is seen in Egypt, where when evaluating 186  
243 samples from Cairo hospitals, *K. pneumoniae* was found as the main gram-negative  
244 bacterial agent representing 40.9% (76/186) of the identified microorganisms, and

245 among these isolates obtained, a high prevalence of resistance to beta-lactams,  
246 quinolones, and sulfonamides was identified (89.4%, 89.4% and 87.1%) respectively.<sup>16</sup>

247 The phenotypic profile of the *K. pneumoniae* isolates analyzed in the present  
248 study demonstrated high levels of resistance to the beta-lactams drugs tested in all  
249 classes evaluated (penicillins, cephalosporins and carbapenems). Although the  
250 resistance profile of strains may vary depending on the test location and the conditions  
251 to prevent spread, the resistance to beta-lactams among *Enterobacteriaceae* is known to  
252 be high, as demonstrated in a study carried out in Brazil, with samples of human and  
253 veterinary origin where 62.85% and 54.28% of *Enterobacteriaceae* isolated were resistant  
254 to amoxicillin/clavulonate and cefazolin respectively.<sup>17</sup>

255 In studies carried out in Egypt, evaluating isolates of *K. pneumoniae* from food  
256 sources, and in Tunisia and Iran evaluating isolates from hospital samples, the  
257 presence of high resistance to beta-lactams can be verified for ampicillin/sulbactam  
258 (93%), ceftazidime (95.5%), cefoxitin (95.5%), cefotaxime (93.2%),  
259 amoxicillin/clavulonate (86.4%), ertapenem (90.9%) and temocillin (84.0%).<sup>18, 19, 20</sup>

260 Likewise, in a study carried out with 102 isolates obtained from two Portuguese  
261 hospitals, the presence of resistance rates > 90% was verified for all beta-lactam drugs  
262 tested, except for cephalosporins: cefoxitin (40.2%), cefotetan (68.6%) and carbapenems:  
263 ertapenem (23.5%), imipenem (32.4%), meropenem (34.3%) and doripenem (33.3%).<sup>21</sup>

264 This result is consistent with that found in this study, where the beta-lactam  
265 drugs that showed a lower resistance rate belonged to the same classes mentioned,  
266 namely: cefoxitin (73.68%), ceftazidime/avibactam (11.76%), ertapenem (44.00%),  
267 imipenem (71.70%) and meropenem (69.81%).

268 Resistance to beta-lactams is conferred in Gram-negatives mainly by genes  
269 belonging to the *bla* family. This group of genes is composed of dozens of subfamilies  
270 and hundreds of genetic subvariants in each family, the molecular panel developed  
271 managed to encompass some of the most predominant and clinical relevant  
272 subfamilies among clinical isolates, identified in several studies, namely: *bla*SHV,  
273 *bla*TEM, *bla*NDM, *bla*KPC, *bla*GES, *bla*CTX-M and *bla*OXA.<sup>22-24</sup>

274 After analysis using the Primer-BLAST® (NCBI, USA) and Primer Stats  
275 Sequence Manipulation Suite (SMS) software, it was verified that the developed  
276 primers have specificity for the sequences used in the alignment, melting temperature  
277 (T<sub>m</sub>) between 59.29 °C and 61.55 °C, GC% concentration varying between 45.45% and  
278 66.67% in addition to having complementary base numbers ≤ 6 in the analysis of dimer  
279 and hairpin formation. The values obtained for these parameters therefore demonstrate  
280 that they are compatible with those obtained in reference studies.<sup>25-27</sup>

281 Due to the high number of sequences included in the development of primers,  
282 many of the alternatives obtained through Primer-BLAST® (NCBI, USA) did not meet  
283 the stability requirements regarding the formation of secondary structures (self-  
284 annealing and hairpins), In order to choose the options with the best performance in  
285 relation to these parameters, the GC clamp was relaxed so that the primers SHV-F,  
286 SHV-R, CTXM1.2L-R and CTXM2L-R obtained 4 G or C residues within the last 5  
287 nucleotides of the 3' end, the primers CTXM9L-R and CTXM2L-F did not present C or  
288 G residues within the last 5 nucleotides of the sequence.

289 This fact could lead to the formation of strong bonds and increase the T<sub>m</sub> value  
290 in primers with more than 3 terminal GC residues, and cause inhibition of  
291 amplification due to the presence of weak bonds when there is an absence of terminal

292 CG <sup>28,29</sup>. Such changes, however, were not evident when the primers were tested *in*  
293 *vitro*.

294 The variety of sequences detectable by the developed primers makes *in vitro*  
295 validation using positive controls for all sequences virtually impossible. *In silico*  
296 analysis allowed the evaluation of all tested sequences quickly, cheaply and constantly,  
297 since the developed primers can be tested against new variants of the target genes.<sup>26-28</sup>

298 *In vitro* analyzes were carried out using SYBR Green master mix, the melting  
299 curve was therefore used as a parameter to evaluate the specificity of the reactions.  
300 And it was verified that for all tested primers a single melting peak was found,  
301 indicating the formation of a single amplicon. And excluding the presence of  
302 secondary structures (primer dimers and hairpins).

303 The analysis of the melting curve and  $T_m$  is considered fundamental to test the  
304 specificity of reactions that use SYBR Green as an amplification indicator, because  
305 unlike reactions that use specific probes, which emit fluorescence only when the  
306 reaction occurs at the expected target. The SYBR Green works by binding to any  
307 double-stranded fragment formed, thus emitting fluorescence. Therefore, only by  
308 analyzing the melting curve and the specific  $T_m$  of the amplicon is it possible to  
309 determine whether the reaction was successful.<sup>29-31</sup>

310 The efficiency curve and its parameters were used to evaluate the performance  
311 of qPCR reactions, by checking how efficiently the targets were amplified in each PCR  
312 cycle.<sup>32, 33</sup> When evaluating the activity of primers in qPCR reactions using the  
313 efficiency curve, it was found that all primers analyzed in this study presented  
314 efficiency values >90% and <110% and correlation coefficients ( $R^2$ ) >0.9, thus being in  
315 accordance with the parameters presented in reference documents present in the

316 literature.<sup>33</sup> It was also possible to verify a high detection capacity even at low  
317 concentrations of genetic material since the detection limit obtained varied between  $\approx 2$   
318 and  $\approx 13$  copies/ $\mu\text{L}$  of the target gene used as control.

319 Several studies report the growth in the prevalence of the *blaKPC* gene, with  
320 this being the most detected carbapenemase worldwide. The values found vary  
321 according to the location. The main variant of the *blaKPC* gene detected is *blaKPC-2*,  
322 with prevalence values varying from 1.2% to 51.6% among enterobacteria in studies  
323 carried out in the United States of America and China respectively.<sup>34, 35</sup> This gene is  
324 found more frequently in isolates of *K. pneumoniae*, many studies report high  
325 prevalence rates in this species ranging from 17.2% to 64.6%.<sup>4, 35, 36, 37</sup>

326 In a study conducted in an intensive care unit in the northeast region of Brazil,  
327 it was shown that of 25 isoates of *K. pneumoniae* obtained during the research, 100%  
328 exhibited the presence of the *blaKPC* gene.<sup>38</sup>

329 The values found in this paper for the *blaKPC* gene may reflect the fact that the  
330 primer developed detected all variants of the gene, as well as the higher rates of  
331 resistance usually found in intensive care unities (ICU).<sup>39</sup>

332 The results found in this work are in agreement with other studies performed at  
333 the northeast of Brazil<sup>38</sup>, what can represent an endemic presence of the *blaKPC* gene  
334 among *K. pneumoniae* isolates in this Brazilian region.

335 The *blaTEM* and *blaSHV* genes were the first ESBL identified, and together with  
336 the *blaCTX-M* subfamily of genes are considered the most prevalent ESBL's. These  
337 genes are widely distributed among enterobacteria; in a study carried out in Sudan, the  
338 *blaTEM*, *blaCTX-M* and *blaSHV* genes were identified in 86.0%, 78.0% and 28.0%  
339 respectively.<sup>40</sup>

340 In a work carried out in ICUs in Chile, it was possible to verify the presence of  
341 these genes with prevalence rates of 81.0%, 84.7% and 73.0% for *blaSHV*, *blaCTX-M-1*  
342 and *blaTEM*, where a higher prevalence of the *blaSHV* gene was found when compared  
343 to the study carried out in Sudan.<sup>41</sup>

344 In Brazil, it is also possible to verify the presence of high prevalence rates of  
345 these genes among *K. pneumoniae* isolates from ICU, with studies indicating rates of  
346 100%, 96% and 72% for *blaTEM*, *blaSHV* and *blaCTX-M1* respectively.<sup>38</sup> These results  
347 agree with those evidenced in this study for the *K. pneumoniae* isolates tested.

348 The *blaNDM* gene is considered the second most prevalent carbapenemase  
349 producing gene in the world, behind only the *blaKPC* gene. In this study, the presence  
350 of the metallo beta-lactamase NDM gene was verified in (33.61%) of the isolates.  
351 Similar results were evidenced in China, where the presence of this gene was verified  
352 in 35.7% of 935 carbapenem-resistant enterobacteria tested.<sup>34</sup>

353 The prevalence found in this study for the *blaNDM* gene is still below what was  
354 found in other studies carried out in Brazil in the states of São Paulo and Sergipe,  
355 where the authors found a prevalence of 70 and 50% respectively in *K. pneumoniae*  
356 isolates.<sup>42, 43</sup>

357 Regarding oxacillinases, a low prevalence of the *blaOXA-48like* gene was  
358 observed (3.28%). This gene may be present in all *Enterobacteriaceae*; however, it is more  
359 prevalent in strains of *K. pneumoniae*.<sup>21</sup>

360 The values found in the literature for the presence of this gene in  
361 *Enterobacteriaceae* are very divergent, with marked variations related to the location of  
362 the analysis, these values vary from 7.3% in China to 83.3% in Morocco.<sup>34, 44</sup> In a study  
363 conducted in Brazil where 4,451 isolates of *Enterobacteriaceae* were analyzed, the

364 *bla*OXA-48like gene was detected in only 2.5% of the isolates tested.<sup>45</sup> In this way, the  
365 result obtained is compatible with what was previously identified in Brazil, and close  
366 to what is seen in China.

367 The presence of variants of the *bla*OXA gene (*bla*-OXA-51like (15.57%), *bla*OXA-  
368 24/40like (11.48%) and *bla*OXA-23like (28.69%)) was also observed in the isolates tested,  
369 these genes were long considered exclusive to strains of *Acinetobacter baumannii*,  
370 however studies have demonstrated the presence of these genes in other  
371 *Enterobacteriaceae*, including *K. pneumoniae*.<sup>46</sup> Results regarding the prevalence of these  
372 genes in strains of *K. pneumoniae* are still scarce, however, in a study conducted in  
373 Bahrain in the Persian Gulf, the *bla*OXA-51 and *bla*OXA-23 genes were identified  
374 respectively in 45.8% and 41.6%. % of *K. pneumoniae* isolates analyzed.<sup>47</sup>

375 It is believed that many of the beta-lactamases that today can be found  
376 contained in mobile genetic elements had their origin in chromosomes of other  
377 bacteria, as occurred with the SHV type variants that derived from the *K. pneumoniae*  
378 chromosomal SHV-1, and the CTX-M type variants that appear to have originated from  
379 the chromosomal CTX-M of *Kluyvera* spp<sup>21</sup>. This change in the presentation of these  
380 genes, from chromosomal to mobile elements, may explain the appearance of genes  
381 such as chromosomal *bla*OXA present in *A. baumannii* strains on plasmids widespread  
382 in other species.

383 It was possible to verify the presence of isolates presenting multiple genes  
384 coding for beta-lactamases, from 3 to 12 of the genes analyzed. Studies point to a high  
385 prevalence among *Enterobacteriaceae* of the accumulation of genes from the *bla* family,  
386 mainly genes belonging to ESBL, OXA beta-lactamases and carbapenemases such as  
387 *bla*KPC and *bla*NDM. This phenomenon is more evident in hospital environments



388 where selective pressure favors microorganisms carrying resistance genes and where  
389 there is a high rate of sharing of these genes.<sup>48,49</sup>

390 Investigations into metabolomic modulation in *K. pneumoniae* have  
391 demonstrated a promising area for understanding resistance to antimicrobial agents,  
392 developing new therapies, and for studying bacterial virulence. For example,  
393 significant inhibition of the pentose phosphate pathway, citrate cycle, amino acid and  
394 nucleotide metabolism was observed to be beneficial during treatment of MDR *K.*  
395 *pneumoniae* using the bacteriophage-polymyxin combination, showing the potential for  
396 new therapeutic targets and pathways metabolic processes to improve the effectiveness  
397 of treatment with available antimicrobial agents.<sup>50,51</sup>

398 This study is in accordance with others that highlighted the importance of the  
399 pentose phosphate pathway in MDR *K. pneumoniae* strains.<sup>50</sup> This finding was present  
400 in both media, supernatant and intracellular in MDR isolates, compared with *K.*  
401 *pneumoniae* isolates susceptible to antimicrobial agents. The significant presence of the  
402 metabolic N-fructosyl isoleucine (C<sub>12</sub>H<sub>23</sub>NO<sub>7</sub>; MW: 293.316) in the supernatant and  
403 intracellular media of *K. pneumoniae* MDR indicates the expression of the fructose  
404 degradation enzyme gene (*frwC*; fructose-specific phosphotransferase system), which is  
405 involved in regulating bacterial growth, virulence and overcoming colonization  
406 resistance due to the use of alternative carbon source from fructose.<sup>52, 53</sup>

407 Metabolomics has proven to be a promising approach in the study of  
408 antimicrobial resistance. Its use allows for the comprehensive investigation of  
409 metabolic changes associates with different resistance mechanisms, such as alternative  
410 energy-obtaining pathways, modifications that alter the cell wall, communication

411 between bacterial cells, and changes in the colonization capacity of these  
412 microorganisms.<sup>54, 55</sup>

413 The identification of these metabolic differences plays an important role in the  
414 Discovery of new therapeutic targets and strategies for investigating the reversal of  
415 resistance in these pathogens.<sup>55-57</sup> The combination of genetic and metabolomic  
416 techniques therefore contributes to a comprehensive view of resistance mechanisms in  
417 bacteria.<sup>56,57</sup>

418 The presence of N-fructosyl isoleucine in resistant strains, and the metabolic  
419 benefit that its presence appears to generate in increasing colonization capacity,  
420 together with the selective pressure found in ICU environments due to the constant use  
421 of antimicrobials may be related to the high rates of resistant isolates disseminated  
422 among patients in this environment.

423 The metabolic evaluation in turn points to a metabolic advantage in resistant  
424 strains compared to sensitive ones, which goes beyond the resistance capacity itself.<sup>58</sup>

425 This study has some limitations, such as the exploration of only *bla* family  
426 genes, limiting a broader understanding of resistance mechanisms to antimicrobial  
427 agents. On the other hand, it presents a broad methodology for exploring the  
428 important *bla* family genes most associated with resistance to beta-lactams in *K.*  
429 *pneumoniae*. The metabolic findings showed a specific indication that suggests an  
430 association with virulence and better proteomic studies will be necessary to associate  
431 with potential mechanisms of resistance to antimicrobial agents. Furthermore,  
432 additional preclinical studies will be necessary to determine and more specifically  
433 validate the virulence associated with the pentose phosphate pathway in *K.*  
434 *pneumoniae*.

435

436

## 437 CONCLUSIONS

438 The results of this work show the high prevalence of resistance to antimicrobial  
439 agents in isolates of *K. pneumoniae* within the hospital environment, and that this  
440 phenotypic pattern exhibited a great concern as it limits the therapeutic options  
441 available, directly implicating the patient's prognosis.

442 The assays developed were within the quality criteria for qPCR reactions using  
443 SYBR Green master mix and were efficient in detecting the beta-lactams resistance  
444 genes from the *bla* family evaluated in this study. The genotypes of the *bla* genes  
445 obtained are relevant and worrying for the local hospital scenario, and compatible with  
446 the identified phenotypic profile.

447 The identification of the metabolic N-fructosyl isoleucine in the supernatant  
448 and intracellular media of *K. pneumoniae* MDR indicates the expression of the fructose  
449 degradation enzyme gene, which is involved in regulating bacterial growth, virulence  
450 and overcoming resistance to colonization due to the use of an alternative carbon  
451 source from fructose.

## 452 MATERIALS AND METHODS

453 **Obtaining bacterial isolates and identification.** For the following study,  
454 samples were collected, as part of the clinical investigation of patients admitted to the  
455 ICU of a tertiary care health unit in the city of Fortaleza-CE. Were included in the work  
456 those microorganisms that were identified as gram-negative bacteria, resistant to two

457 or more groups of antimicrobial agents, including subclasses of  $\beta$ -lactams,  
458 fluoroquinolones and aminoglycosides.

459 The bacterial isolates were identified and tested for their susceptibility to  
460 antimicrobials using the automated VITEK® 2 Compact method (BioMérieux, Marcy  
461 l’Etoile, France), according to the manufacturer’s recommendations. Minimum  
462 inhibitory concentrations were interpreted according to the Clinical and Laboratory  
463 Standards Institute (CLSI). For quality control of sensitivity tests, strains from the  
464 American Type Culture Collection (ATCC) were used. Specimens that had a resistance  
465 profile that fit the research objectives were included in the study.

466 **Extraction of bacterial DNA.** To extract the genetic material, the Wizard  
467 Genomic DNA Purification extraction and purification kit (Promega, Madison, USA)  
468 was used, according to the manufacturer's recommendations.

469 After extraction, all samples were then quantified by spectrophotometry using  
470 the NanoDrop™ 2000 (Thermo Fisher Scientific, Waltham, Massachusetts, USA) and  
471 stored in a -80°C freezer until used in the experiments.

472 **Selection of genes used in the study and obtaining FASTA sequences.** For  
473 greater coverage of the genetic profile of resistance to  $\beta$ -lactams in gram-negatives,  
474 genes with relevant prevalence epidemiology, belonging to the *bla* gene family, were  
475 part of the study, and these included the genes: *blaSHV*, *blaTEM*, *blaNDM*, *blaKPC*,  
476 *blaGES*, *blaCTX-M* and *blaOXA*. The sequences used were obtained through the  
477 Comprehensive Antibiotic Resistance Database (CARD) and National Center for  
478 Biotechnology information (NCBI) platforms, which compiles and organizes the

479 resistance gene sequences available in GenBank, the list of identifiable sequences is  
480 available in the supplementary material Text S1.

481 **Primer design.** To design the primers, all variant sequences of each gene  
482 included in the study available on the CARD and NCBI platforms were gathered, the  
483 sequences were aligned using the Clustal Omega software, and the alignments were  
484 analyzed using the SnapGene software.

485 Consensus regions with homology  $\geq 95\%$  were selected and these were used to  
486 design the primers using the Primer Blast platform from the National Center for  
487 Biotechnology and Information (NCBI, USA). The consensus sequences obtained is  
488 available in the supplementary material Text S2.

489 Genes with few conserved regions, for which it was not possible to obtain  
490 consensus sequences with homology  $\geq 95\%$ , were separated into clades, and primers  
491 were then designed for the sequences by phylogenetic grouping, complying with a  
492 minimum of 95% similarity.

493 ***In silico* validation of the developed primers.** All primers developed were  
494 validated *in silico* regarding their specificity, structure, formation of primer-dimers and  
495 hairpins using the Primer-BLAST® (NCBI, USA) and Sequence Manipulation Suite  
496 (SMS): PCR Primer Stats platforms.

497 **Testing, optimization, and standardization of primers.** The reactions were  
498 standardized with the use of positive controls developed in-house, through  
499 amplification of genetic material, isolation, and purification of amplicons, originating  
500 from isolates phenotypically resistant to beta-lactams, and negative control (water  
501 DNase/RNase free). They were carried out using a CYBR Green master mix (Promega,

502 Madison, USA), the initial results were evaluated regarding the melting temperature  
503 ( $T_m$ ), to confirm the specificity of the amplicons.

504 To determine the most efficient qPCR conditions, to reduce the existence of  
505 non-specificity and facilitate the interpretation of the results, the concentration gradient  
506 and annealing temperature ( $T_a$ ) of the primers were performed. The qPCR reaction  
507 conditions included a hot start step at 95°C for 2 minutes, followed by 35 cycles  
508 consisting of a denaturation step for 15 seconds at 95°C, and an annealing/extension  
509 step for 1 minute at  $T_a$ . specific to each primer, all reactions went through a final  
510 melting curve step, with a temperature variation of 60 to 95°C with an increase of  
511 0.05°C/sec.

512 A 9-point efficiency curve was performed with a dilution factor of 1:8, for each  
513 primer developed, with concentrations ranging from  $\approx 27,438,596$  to  $\approx 2$  (copies/ $\mu$ L),  
514 through this procedure it was possible to determine the values of threshold, evaluate  
515 the efficiency (%), the correlation coefficient ( $R^2$ ) and the limit of detection of each  
516 primer.

517 **Detection of resistance-related genes by molecular biology.** The *K. pneumoniae*  
518 isolates obtained in the study were tested against the developed primers. Melting  
519 curve analysis of all reactions was used to evaluate the specificity of the results of the  
520 isolates in comparison to the specific melting temperature ( $T_m$ ) of the positive control.

521 **Preparation of *K. pneumoniae* samples for metabolomic evaluation.** Isolates  
522 of *K. pneumoniae* susceptible and multidrug resistant to antimicrobial agents obtained  
523 in this work were submitted for metabolomic analysis. For this experiment, seven  
524 samples of the culture supernatant were designed: one sample of the culture medium,  
525 two samples of the culture supernatant of susceptible *K. pneumoniae* (biological

526 replicates), four samples of the culture supernatant of multidrug-resistant *K.*  
527 *pneumoniae* (MDR) for untargeted metabolomics determination and analysis. Samples  
528 of the intracellular medium of the *K. pneumoniae* culture, two samples of susceptible *K.*  
529 *pneumoniae* (biological replicates) and four samples of MDR *K. pneumoniae* were also  
530 used for untargeted metabolomic analysis. Technical replicates were performed for  
531 susceptible media and samples to allow for a pilot statistical comparison.

532 **Methodology for extracting *K. pneumoniae* culture supernatant.** To 200  $\mu\text{L}$  of  
533 *K. pneumoniae* culture medium or control medium, 800  $\mu\text{L}$  of 80% methanol was added  
534 at  $-20^\circ\text{C}$ . The samples were vortexed and incubated at  $-20^\circ\text{C}$  for 2 hours for protein  
535 precipitation. The samples were centrifuged for 10 min at  $4^\circ\text{C}$  at 10,000 g (Benchtop  
536 refrigerated centrifuge 10k RPM Eppendorf) and the supernatants were transferred to  
537 new tubes. The samples were dried under vacuum (Speed Vac Thermo fisher) for  
538 approximately 4-5 hours. Dried samples were redissolved in 100  $\mu\text{L}$  of 0.1% formic  
539 acid in water containing Metabolomics QReSS labeled heavy standards diluted 100X.  
540 ([https://www.isotope.com/userfiles/files/assetLibrary/MET\\_RSCH\\_QReSS.pdf](https://www.isotope.com/userfiles/files/assetLibrary/MET_RSCH_QReSS.pdf)). A  
541 quality control (QC) was done, combining 10  $\mu\text{L}$  of each sample. After the QC test in  
542 the mass spectrometer, the samples were diluted 10x to be analyzed. The injection  
543 volume of each sample was 10  $\mu\text{L}$  per ionization mode.

544 **Methodology for extractions from the intracellular medium of *K. pneumoniae***  
545 **culture.** To each tube, 750  $\mu\text{L}$  of cold chloroform:methanol (2:1) mixture at  $-20^\circ\text{C}$  was  
546 added, vortexed and transferred to tubes reinforced with a ball beater. Cells were  
547 disrupted in a bead beater with steel balls for 3 min at an intensity of 5 (Bead Ruptor  
548 Elite Omni International Material). The tubes were shaken vigorously for 30 min at  $4^\circ\text{C}$   
549 in a temperature-controlled thermal shaker (Thermomixer Eppendorf). 400  $\mu\text{L}$  of water

550 was added, shaken vigorously, and centrifuged for 10 min at 10,000 rpm (Benchtop  
551 refrigerated centrifuge 10k RPM Eppendorf) for phase separation. The upper  
552 aqueous/methanolic phase was saved as a mixture of soluble metabolites and  
553 transferred to Eppendorf tubes. Soluble metabolites were dried under vacuum for 3-4 h  
554 (Speed Vac Thermo Fisher). Before running, samples were reconstituted in 100  $\mu$ L of  
555 0.1% formic acid in water containing 100X diluted Metabolomics QReSS labeled heavy  
556 standards  
557 ([https://www.isotope.com/userfiles/files/assetLibrary/MET\\_RSCH\\_QReSS.pdf](https://www.isotope.com/userfiles/files/assetLibrary/MET_RSCH_QReSS.pdf)). The  
558 QC sample was prepared with 10  $\mu$ L of each sample. The injection volume of each  
559 sample was 10  $\mu$ L.

560 **Analysis by Ultra Performance Liquid Chromatography Coupled to Tandem**  
561 **Mass Spectrometry (UPLC-MS/MS) of metabolites.** MS data were acquired on the  
562 Orbitrap IDX spectrometer (Thermo) connected to the Vanquish UPLC system. Soluble  
563 metabolites were separated using a Waters BEH C18 column (100 x 2.1 mm, 1.9  $\mu$ m)  
564 operated at 30 °C and a flow rate of 250  $\mu$ L/min. Mobile phase A was 0.1% formic acid  
565 in water and mobile phase B was 0.1% formic acid in 90% methanol. Bulk scan range:  
566 67-1000 at 120,000 resolutions with 0.6 sec scan range. The 10 most intense ions in each  
567 full scan were selected for fragmentation and MS2 spectra were acquired at a  
568 resolution of 30,000 and scaled collision dissociation fragmentation energy of 25, 30, 35  
569 was used.

570 **UPLC gradient.** The total time used in the UPLC gradient runs was 15 minutes.  
571 The flow used was 0.250 mL/min and the following gradient in the percentage of  
572 mobile phase B was 50% at 8 min, 98% at 9 min. maintaining until a time of 13 min.,  
573 ending with 0% between a time of 13.1 – 15 min.



574           **Verification settings in the mass spectrum.** The configurations used in the  
575 verification through the mass spectrum were orbit trap of the mass spectrum in the  
576 master scan, with an orbitrap detector with a resolution of 120,000. We used  
577 quadrupole isolation with a scanning range between 67-1000 m/z, using the frequency  
578 lens at 60%. The automatic gain control target was customized and normalized to 25%.  
579 The maximum injection time mode has been customized with a maximum injection  
580 time of 50 ms. Microscans of 1 and profile with positive polarity. Font fragmentation  
581 has been disabled.

582           **Data acquisition, metabolic identification, and data analysis.** Once the data  
583 was acquired, the samples were analyzed using the open-source software MS-DIAL.  
584 More details about the software can be obtained here:  
585 <http://prime.psc.riken.jp/compms/msdial/main.html>.<sup>59,60</sup> Three blank samples were  
586 included in the analysis to identify background ions and remove them later. Samples  
587 acquired using MS1 full scan used for quantification and data-dependent acquisition  
588 (DDA) mode were used for spectral identification of metabolites. Tolerance MS1 was  
589 set to 0.01 Da and MS2 set to 0.025 Da. For peak harvesting, the mass slice width was  
590 set to 0.1. For peak alignment, the maximum retention time tolerance was set at 0.5  
591 min, the MS1 tolerance was set at 0.01. Peaks were identified by searching MS2 spectra  
592 in the public MS-DIAL database downloaded in January 2023 (324,191 records for  
593 positive mode and 64,669 entries for negative mode) using a mass tolerance of 0.01 Da  
594 for MS1 and 0.05 Gives to MSMS with an identification cutoff point of 80%  
595 <http://prime.psc.riken.jp/compms/msdial/main.html#MSP>. Additionally, peaks were  
596 also searched against the core Biomolecular Analysis Facility's internal IROA library  
597 (both positive and negative mode) with a mass tolerance of 0.02 and identification

598 cutoff of 85%. The data was manually inspected and identifications without MS2 were  
599 filtered, except for identifications of the IROA molecule.

600

601

602

603 **Supplementary Materials:** The following supporting information: Figures S1-S7; Text  
604 S1; Text S2.

605 **Figure supplement legend:**

606 **Figure S1** – Primer’s specificity evaluation through Melting curve: (A) SHV, (B)  
607 KPC, (C) NDM, (D) TEM, (E) GES, (F) OXA-23like, (G) OXA-24/40like, (H) OXA-48like,  
608 (I) OXA-51like, (J) CTX-M 1.1like, (K) CTX-M 1.2like, (L) CTX-M 2like, (M) CTX-M 8like e  
609 (N) CTX-M 9like.

610 **Figure S2** - Plot analysis of the 25 main metabolites from the supernatant of  
611 susceptible *K. pneumoniae* in general without separation by up- or down-regulation of  
612 the analytes. Note that in the supernatant of *K. pneumoniae* compared to the culture  
613 media, metabolites related to the synthesis of nitrogenous bases, protein synthesis and  
614 energy supply to the bacterial cell are significantly increased.

615 **Figure S3** - Plot of the analysis of the 25 main metabolites from the supernatant  
616 of susceptible *K. pneumoniae*, separated because they were up-regulated in relation to  
617 the control culture media.

618 **Figure S4** - Plot of the analysis of the 25 main metabolites from the supernatant  
619 of susceptible *K. pneumoniae*, separated because they were down-regulated in relation  
620 to the control culture media.

621 **Figure S5** - Plot of the analyzes of the 25 main metabolites from the supernatant  
622 of Multidrug-Resistant (MDR) *K. pneumoniae* in general without separation by up- or  
623 down-regulation in the analytes. Note that in the intracellular media of *K. pneumoniae*  
624 compared to the culture medium, metabolites related to the synthesis of nitrogenous  
625 bases, protein synthesis and energy supply to the bacterial cell are significantly  
626 increased.

627 **Figure S6** - Plot of the analysis of the 25 main metabolites from the supernatant  
628 of *K. pneumoniae* MDR, separated by being up-regulated in relation to the control  
629 culture media.

630 **Figure S7** - Plot d of the analysis of the 25 main metabolites from the  
631 supernatant of *K. pneumoniae* MDR, separated because they were down-regulated in  
632 relation to the control culture media.

633

#### 634 AUTHOR INFORMATION

##### 635 **Corresponding Authors:**

636 **Aldo A.M. Lima** - Institute of Biomedicine, Faculty of Medicine, Federal University of Ceara,  
637 Fortaleza-Ceara 60430-270, Brazil. Postgraduate Medical Microbiology Program, Department  
638 of Medicine, Federal University of Ceara, Fortaleza-Ceara 60430-270, Brazil.  
639 <https://orcid.org/0000-0002-0299-1747>

640 **Email:** [alima@ufc.br](mailto:alima@ufc.br)

641 **José Kleybson de Sousa** – Department of Pediatrics Gastroenterology, UVA Hospital,  
642 University of Virginia, Charlottesville, Virginia 22903, United States;  
643 <https://orcid.org/0000-0003-3512-484X>

644 Email: [ztx7ex@virginia.edu](mailto:ztx7ex@virginia.edu);

645

646 **Authors**

647 Lavouisier F.B. Nogueira - Institute of Biomedicine, Faculty of Medicine, Federal University

648 of Ceara, Fortaleza-Ceara 60430-270, Brazil. Postgraduate Medical Microbiology Program,

649 Department of Medicine, Federal University of Ceara, Fortaleza-Ceara 60430-270, Brazil.

650 <https://orcid.org/0000-0002-5008-8181>

651 Marília S. Maia - Institute of Biomedicine, Faculty of Medicine, Federal University of Ceara,

652 Fortaleza-Ceara 60430-270, Brazil. Postgraduate Medical Microbiology Program, Department

653 of Medicine, Federal University of Ceara, Fortaleza-Ceara 60430-270, Brazil.

654 <https://orcid.org/0000-0002-7005-7841>

655 Marco A.F Clementino - Institute of Biomedicine, Faculty of Medicine, Federal University of

656 Ceara, Fortaleza-Ceara 60430-270, Brazil. Postgraduate Medical Microbiology Program,

657 Department of Medicine, Federal University of Ceara, Fortaleza-Ceara 60430-270, Brazil.

658 <https://orcid.org/0000-0002-0628-8047>

659 Ila F.N. Lima – Hospital Universitário Walter Cantídio, Federal University of Ceara,

660 Fortaleza-Ceara 60430-270, Brazil.

661 Jorge L.N. Rodrigues - Hospital Universitário Walter Cantídio, Federal University of Ceara,

662 Fortaleza-Ceara 60430-270, Brazil.

663 Luciana V.C. Frago - Hospital Universitário Walter Cantídio, Federal University of Ceara,

664 Fortaleza-Ceara 60430-270, Brazil.

665 Glairta S. Costa - Hospital Universitário Walter Cantídio, Federal University of Ceara,  
666 Fortaleza-Ceara 60430-270, Brazil.

667 Jose Q.S. Filho - Institute of Biomedicine, Faculty of Medicine, Federal University of Ceara,  
668 Fortaleza-Ceara 60430-270, Brazil. <https://orcid.org/0000-0002-9619-4553>

669 Alexandre Havt - Institute of Biomedicine, Faculty of Medicine, Federal University of Ceara,  
670 Fortaleza-Ceara 60430-270, Brazil. Postgraduate Medical Microbiology Program, Department  
671 of Medicine, Federal University of Ceara, Fortaleza-Ceara 60430-270, Brazil.  
672 <https://orcid.org/0000-0002-4546-2976>

673 Deiziane V.S. Costa - Infectious Diseases and International Health, University of Virginia,  
674 Charlottesville, VA 22908. <https://orcid.org/0000-0001-6402-8908>

675 Lyvia M.V.C. Magalhães - Institute of Biomedicine, Faculty of Medicine, Federal University  
676 of Ceara, Fortaleza-Ceara 60430-270, Brazil. <https://orcid.org/0000-0001-6990-4903>

677 Dilza Silva - Biomolecular Analysis Facility, School of Medicine, University of Virginia,  
678 Charlottesville, VA 22908. <https://orcid.org/0000-0002-6519-346X>

679 Nicholas E. Sherman - Biomolecular Analysis Facility, School of Medicine, University of  
680 Virginia, Charlottesville, VA 22908. <https://orcid.org/0000-0003-3206-3113>

681

682 **Author Contributions:**

- 683 • Bibliographic review and data collection, Lavouisier F.B. Nogueira, Marília S.  
684 Maia, Marco A.F Clementino and Aldo A.M. Lima.

- 685 • Methodology, Lavouisier F.B. Nogueira, Marília S. Maia, Marco A.F  
686 Clementino, Alexandre Havt, Ila F.N. Lima, Jorge L.N. Rodrigues, Luciana V. C.  
687 Fragoso and Aldo A. M. Lima.
- 688 • Bioinformatics, Lavouisier F.B. Nogueira and Marco A.F Clementino.
- 689 • In silico analyses, Lavouisier F.B. Nogueira, Marco A.F Clementino.
- 690 • In vitro validation of primers and sample testing, Lavouisier F.B. Nogueira,  
691 Marília S. Maia.
- 692 • Metabolomics, Datascience and data Bank, Jose Q.S. Filho; Deiziane V.S. Costa,  
693 José K. Sousa, Lyvia M.V.C. Magalhães, Dilza Silva, Nicholas E. Sherman and  
694 Aldo A.M. Lima
- 695 • Written review and editing, Lavouisier F.B. Nogueira.
- 696 • Supervision, Alexandre Havt and Aldo A.M. Lima.
- 697 • Project administration, Aldo A.M. Lima.
- 698 • Resource acquisition, Aldo A.M. Lima.

699

700 **Funding:** This research was funded by CNPq (<http://www.cnpq.br>), grant numbers  
701 402607/2018-0 and 408549/2022-0 and FUNCAP (<https://www.funcap.ce.gov.br/>), grant  
702 number: OFÍCIO Nº 102/2021 – DINOVI.

703 **Acknowledge:** This work used the following equipments (Benchtop refrigerated  
704 centrifuge 10k RPM Eppendorf; Speed Vac Thermo fisher; Bead Ruptor Elite Omni  
705 International Material; Thermomixer Eppendorf; Orbitrap IDX spectrometer (Thermo)  
706 connected to the Vanquish UPLC system) available in the Biomolecular Analysis Core  
707 Facility which is supported by the University of Virginia School of Medicine, Research  
708 Resource Identifiers (RRID):SCR\_025476.

709

710 **Data Availability Statement:** The data and reports relating to this study will be  
711 available via direct request via email to the corresponding author.

712

713 **Conflicts of Interest:** The authors declare that there are no financial or personal  
714 conflicts of interest that may have influenced the work.

## 715 REFERENCES

716

717 (1) Munita, J. M.; Arias, C. A. Mechanisms of Antibiotic Resistance. *Microbiol Spectr* **2016**, *4*  
718 (2). <https://doi.org/10.1128/MICROBIOLSPEC.VMBF-0016-2015>.

719 (2) Frieri, M.; Kumar, K.; Boutin, A. Antibiotic Resistance. *J Infect Public Health* **2017**, *10* (4),  
720 369–378. <https://doi.org/10.1016/j.jiph.2016.08.007>.

721 (3) Holt, K. E.; Wertheim, H.; Zadoks, R. N.; Baker, S.; Whitehouse, C. A.; Dance, D.; Jenney,  
722 A.; Connor, T. R.; Hsu, L. Y.; Severin, J.; Brisse, S.; Cao, H.; Wilksch, J.; Gorrie, C.; Schultz,  
723 M. B.; Edwards, D. J.; Van Nguyen, K.; Nguyen, T. V.; Dao, T. T.; Mensink, M.; Le Minh,  
724 V.; Nhu, N. T. K.; Schultsz, C.; Kuntaman, K.; Newton, P. N.; Moore, C. E.; Strugnell, R.  
725 A.; Thomson, N. R. Genomic Analysis of Diversity, Population Structure, Virulence, and  
726 Antimicrobial Resistance in *Klebsiella Pneumoniae*, an Urgent Threat to Public Health.  
727 *Proc Natl Acad Sci U S A* **2015**, *112* (27), E3574–E3581.  
728 [https://doi.org/10.1073/PNAS.1501049112/SUPPL\\_FILE/PNAS.1501049112.SD01.XLSX](https://doi.org/10.1073/PNAS.1501049112/SUPPL_FILE/PNAS.1501049112.SD01.XLSX).

729 (4) Asri, N. A. M.; Ahmad, S.; Mohamud, R.; Hanafi, N. M.; Zaidi, N. F. M.; Irekeola, A. A.;  
730 Shueb, R. H.; Yee, L. C.; Noor, N. M.; Mustafa, F. H.; Yean, C. Y.; Yusof, N. Y. Global  
731 Prevalence of Nosocomial Multidrug-Resistant *Klebsiella Pneumoniae*: A Systematic  
732 Review and Meta-Analysis. *Antibiotics* **2021**, *10* (12).  
733 <https://doi.org/10.3390/ANTIBIOTICS10121508>.

- 734 (5) Sharma, A.; Thakur, A.; Thakur, N.; Kumar, V.; Chauhan, A.; Bhardwaj, N. Changing  
735 Trend in the Antibiotic Resistance Pattern of Klebsiella Pneumonia Isolated From  
736 Endotracheal Aspirate Samples of ICU Patients of a Tertiary Care Hospital in North  
737 India. *Cureus* **2023**, *15* (3). <https://doi.org/10.7759/CUREUS.36317>.
- 738 (6) Cortés, G.; Borrell, N.; De Astorza, B.; Gómez, C.; Sauleda, J.; Albertí, S. Molecular  
739 Analysis of the Contribution of the Capsular Polysaccharide and the Lipopolysaccharide  
740 O Side Chain to the Virulence of Klebsiella Pneumoniae in a Murine Model of  
741 Pneumonia. *Infect Immun* **2002**, *70* (5), 2583–2590. [https://doi.org/10.1128/IAI.70.5.2583-](https://doi.org/10.1128/IAI.70.5.2583-2590.2002/FORMAT/EPUB)  
742 [2590.2002/FORMAT/EPUB](https://doi.org/10.1128/IAI.70.5.2583-2590.2002/FORMAT/EPUB).
- 743 (7) Struve, C.; Bojer, M.; Krogfelt, K. A. Identification of a Conserved Chromosomal Region  
744 Encoding Klebsiella Pneumoniae Type 1 and Type 3 Fimbriae and Assessment of the Role  
745 of Fimbriae in Pathogenicity. *Infect Immun* **2009**, *77* (11), 5016–5024.  
746 <https://doi.org/10.1128/IAI.00585-09/FORMAT/EPUB>.
- 747 (8) Lin, C. T.; Chen, Y. C.; Jinn, T. R.; Wu, C. C.; Hong, Y. M.; Wu, W. H. Role of the CAMP-  
748 Dependent Carbon Catabolite Repression in Capsular Polysaccharide Biosynthesis in  
749 Klebsiella Pneumoniae. *PLoS One* **2013**, *8* (2), e54430.  
750 <https://doi.org/10.1371/JOURNAL.PONE.0054430>.
- 751 (9) Davies, J.; Davies, D. Origins and Evolution of Antibiotic Resistance. *Microbiol Mol Biol*  
752 *Rev* **2010**, *74* (3), 417. <https://doi.org/10.1128/MMBR.00016-10>.
- 753 (10) Salipante, S. J.; Jerome, K. R. Digital PCR-An Emerging Technology with Broad  
754 Applications in Microbiology. *Clin Chem* **2020**, *66* (1), 117–123.  
755 <https://doi.org/10.1373/CLINCHEM.2019.304048>.
- 756 (11) Fortuin, S.; Soares, N. C. The Integration of Proteomics and Metabolomics Data Paving  
757 the Way for a Better Understanding of the Mechanisms Underlying Microbial Acquired  
758 Drug Resistance. *Frontiers in Medicine* **2022**, *9*. <https://doi.org/10.3389/fmed.2022.849838>.



- 759 (12) Zeng, C.; Tandhanskul, A.; Krungkaew, S.; Likhanapaiboon, T.; Kasayapanan, W.;  
760 Yasurin, P.; Tang, J.; Phusantisampan, T.; Tawai, A. Research Progress on Using Omics  
761 Technology to Examine the Antimicrobial Mechanisms of Natural Active Substances.  
762 Applied Science and Engineering Progress 2024.  
763 <https://doi.org/10.14416/j.asep.2024.07.003>.
- 764 (13) Bush, K.; Bradford, P. A.  $\beta$ -Lactams and  $\beta$ -Lactamase Inhibitors: An Overview. *Cold*  
765 *Spring Harb Perspect Med* **2016**, 6 (8). <https://doi.org/10.1101/CSHPERSPECT.A025247>.
- 766 (14) Ferreira, A. M.; Martins, K. B.; Silva, V. R. da; Mondelli, A. L.; Cunha, M. de L. R. de S. da.  
767 Correlation of Phenotypic Tests with the Presence of the BlaZ Gene for Detection of Beta-  
768 Lactamase. *Braz J Microbiol* **2017**, 48 (1), 159–166.  
769 <https://doi.org/10.1016/J.BJM.2016.10.011>.
- 770 (15) Zhu, L. J.; Pan, Y.; Gao, C. Y.; Hou, P. F. Distribution of Carbapenemases and Efflux  
771 Pump in Carbapenem-Resistance Acinetobacter Baumannii. *Ann Clin Lab Sci* **2020**, 50 (2).
- 772 (16) Makhirita, R. R.; El-Kholy, I.; Hetta, H. F.; Abdelaziz, M. H.; Hagagy, F. I.; Ahmed, A. A.;  
773 Algammal, A. M. Antibioqram and Genetic Characterization of Carbapenem-Resistant  
774 Gram-Negative Pathogens Incriminated in Healthcare-Associated Infections. *Infect Drug*  
775 *Resist* **2020**, 13, 3991–4002. <https://doi.org/10.2147/IDR.S276975>.
- 776 (17) Santos, A. L.; Dos Santos, A. P.; Ito, C. R. M.; de Queiroz, P. H. P.; de Almeida, J. A.;  
777 Júnior, M. A. B. de C.; de Oliveira, C. Z.; Avelino, M. A. G.; Wastowski, I. J.; Gomes, G. P.  
778 L. A.; E Souza, A. C. S.; Vasconcelos, L. S. N. de O. L.; Santos, M. de O.; da Silva, C. A.;  
779 Carneiro, L. C. Profile of Enterobacteria Resistant to Beta-Lactams. *Antibiotics* **2020**, 9 (7),  
780 1–18. <https://doi.org/10.3390/ANTIBIOTICS9070410>.
- 781 (18) Abdel-Rhman, S. H. Characterization of  $\beta$ -Lactam Resistance in *K. Pneumoniae*  
782 Associated with Ready-to-Eat Processed Meat in Egypt. *PLoS One* **2020**, 15 (9), e0238747.  
783 <https://doi.org/10.1371/JOURNAL.PONE.0238747>.

- 784 (19) Messaoudi, A.; Mansour, W.; Jaidane, N.; Chaouch, C.; Boujaâfar, N.; Bouallègue, O.  
785 Epidemiology of Resistance and Phenotypic Characterization of Carbapenem Resistance  
786 Mechanisms in *Klebsiella Pneumoniae* Isolates at Sahloul University Hospital-Sousse,  
787 Tunisia. *Afr Health Sci* **2019**, *19* (2), 2008–2020. <https://doi.org/10.4314/AHS.V19I2.24>.
- 788 (20) Farhadi, M.; Ahanjan, M.; Goli, H. R.; Haghshenas, M. R.; Gholami, M. High Frequency of  
789 Multidrug-Resistant (MDR) *Klebsiella Pneumoniae* Harboring Several  $\beta$ -Lactamase and  
790 Integron Genes Collected from Several Hospitals in the North of Iran. *Annals of Clinical*  
791 *Microbiology and Antimicrobials* **2021**, *20* (1). <https://doi.org/10.1186/s12941-021-00476-1>.
- 792 (21) Oliveira, R.; Castro, J.; Silva, S.; Oliveira, H.; Saavedra, M. J.; Azevedo, N. F.; Almeida, C.  
793 Exploring the Antibiotic Resistance Profile of Clinical *Klebsiella Pneumoniae* Isolates in  
794 Portugal. *Antibiotics (Basel)* **2022**, *11* (11). <https://doi.org/10.3390/ANTIBIOTICS11111613>.
- 795 (22) Bush, K.; Bradford, P. A. Epidemiology of  $\beta$ -Lactamase-Producing Pathogens. *Clin*  
796 *Microbiol Rev* **2020**, *33* (2). <https://doi.org/10.1128/CMR.00047-19>.
- 797 (23) Castanheira, M.; Simner, P. J.; Bradford, P. A. Extended-Spectrum  $\beta$ -Lactamases: An  
798 Update on Their Characteristics, Epidemiology and Detection. *JAC Antimicrob Resist* **2021**,  
799 *3* (3). <https://doi.org/10.1093/JACAMR/DLAB092>.
- 800 (24) Gundran, R. S.; Cardenio, P. A.; Villanueva, M. A.; Sison, F. B.; Benigno, C. C.;  
801 Kreausukon, K.; Pichpol, D.; Punyapornwithaya, V. Prevalence and Distribution of  
802 *Bla*CTX-M, *Bla*SHV, *Bla*TEM Genes in Extended- Spectrum  $\beta$ - Lactamase- Producing *E.*  
803 *Coli* Isolates from Broiler Farms in the Philippines. *BMC Vet Res* **2019**, *15* (1).  
804 <https://doi.org/10.1186/S12917-019-1975-9>.
- 805 (25) Queiroz, J. A. da S.; Alves, L. S.; Dall'acqua, D. S. V.; Souza, L. F. B.; Faculdades  
806 Integradas Aparício Carvalho. Porto Velho, R. Brasil.; Faculdades Integradas Aparício  
807 Carvalho. Porto Velho, R. Brasil.; Fundação Oswaldo Cruz. Porto Velho, R. Brasil. / F. I.  
808 A. Carvalho. P. V. R. Brasil.; Faculdades Integradas Aparício Carvalho. Porto Velho, R.

- 809           Brasil. Desenho e Validação de Primers In Silico Para Detecção Do Vírus Sincicial  
810           Respiratório Humano. *Revista FIMCA* **2017**, *4* (1), 17–30.
- 811   (26)   Kumar, A.; Chordia, N. In Silico PCR Primer Designing and Validation. *Methods Mol Biol*  
812           **2015**, *1275*, 143–151. [https://doi.org/10.1007/978-1-4939-2365-6\\_10](https://doi.org/10.1007/978-1-4939-2365-6_10).
- 813   (27)   Rodríguez, A.; Rodríguez, M.; Córdoba, J. J.; Andrade, M. J. Design of Primers and Probes  
814           for Quantitative Real-Time PCR Methods. *Methods in Molecular Biology* **2015**, *1275*, 31–56.  
815           [https://doi.org/10.1007/978-1-4939-2365-6\\_3](https://doi.org/10.1007/978-1-4939-2365-6_3).
- 816   (28)   van Weezep, E.; Kooi, E. A.; van Rijn, P. A. PCR Diagnostics: In Silico Validation by an  
817           Automated Tool Using Freely Available Software Programs. *J Virol Methods* **2019**, *270*,  
818           106–112. <https://doi.org/10.1016/J.JVIROMET.2019.05.002>.
- 819   (29)   Yang, J.; Kemps-Mols, B.; Spruyt-Gerritse, M.; Anholts, J.; Claas, F.; Eikmans, M. The  
820           Source of SYBR Green Master Mix Determines Outcome of Nucleic Acid Amplification  
821           Reactions. *BMC Res Notes* **2016**, *9* (1), 1–10. [https://doi.org/10.1186/S13104-016-2093-](https://doi.org/10.1186/S13104-016-2093-4/FIGURES/4)  
822           4/FIGURES/4.
- 823   (30)   Wang, Y.; Li, W.; Guo, X.; Zhang, D.; Sun, J.; Fu, Z.; Liu, G.; Li, Y.; Jiang, S. Development  
824           of SYBR Green I-Based Polymerase Chain Reaction for Feline Bocavirus 1 Detection. *3*  
825           *Biotech* **2021**, *11* (2). <https://doi.org/10.1007/S13205-020-02577-8>.
- 826   (31)   Desriani; Azamris; Ghaissani, S. S.; Kinanti, S. R.; Warisman, M. A.; Fitria, N. Design and  
827           Characterization of a SYBR Green I-Based Melting Curve Method for Investigation of  
828           HER2I655V Polymorphism in Breast Cancer. *J Genet Eng Biotechnol* **2021**, *19* (1).  
829           <https://doi.org/10.1186/S43141-020-00108-9>.
- 830   (32)   Svec, D.; Tichopad, A.; Novosadova, V.; Pfaffl, M. W.; Kubista, M. How Good Is a PCR  
831           Efficiency Estimate: Recommendations for Precise and Robust QPCR Efficiency  
832           Assessments. *Biomol Detect Quantif* **2015**, *3*, 9–16.  
833           <https://doi.org/10.1016/J.BDQ.2015.01.005>.

- 834 (33) Thermo Fisher Scientific. *Real-Time PCR: Understanding Ct - US*.  
835 [https://www.thermofisher.com/us/en/home/life-science/pcr/real-time-pcr/real-time-pcr-](https://www.thermofisher.com/us/en/home/life-science/pcr/real-time-pcr/real-time-pcr-learning-center/real-time-pcr-basics/real-time-pcr-understanding-ct.html)  
836 [learning-center/real-time-pcr-basics/real-time-pcr-understanding-ct.html](https://www.thermofisher.com/us/en/home/life-science/pcr/real-time-pcr/real-time-pcr-learning-center/real-time-pcr-basics/real-time-pcr-understanding-ct.html) (accessed 2024-  
837 05-05).
- 838 (34) Han, R.; Shi, Q.; Wu, S.; Yin, D.; Peng, M.; Dong, D.; Zheng, Y.; Guo, Y.; Zhang, R.; Hu, F.  
839 Dissemination of Carbapenemases (KPC, NDM, OXA-48, IMP, and VIM) Among  
840 Carbapenem-Resistant Enterobacteriaceae Isolated From Adult and Children Patients in  
841 China. *Front Cell Infect Microbiol* **2020**, *10*, 314. <https://doi.org/10.3389/FCIMB.2020.00314>.
- 842 (35) Marschall, J.; Tibbetts, R. J.; Dunne, W. M.; Frye, J. G.; Fraser, V. J.; Warren, D. K. Presence  
843 of the KPC Carbapenemase Gene in Enterobacteriaceae Causing Bacteremia and Its  
844 Correlation with In Vitro Carbapenem Susceptibility. *J Clin Microbiol* **2009**, *47* (1), 239.  
845 <https://doi.org/10.1128/JCM.02123-08>.
- 846 (36) Kharazmkia, A.; Amirizadeh, M.; Goudarzi, Z.; Birjandi, M.; Barfipoursalar, A.; Mir, S.  
847 Prevalence of KPC-Producing Bacteria in Negative Gram of Clinical Samples Obtained  
848 from Patients. *Annals of Medicine and Surgery* **2022**, *77*, 103690.  
849 <https://doi.org/10.1016/J.AMSU.2022.103690>.
- 850 (37) Pawłowska, I.; Ziółkowski, G.; Jachowicz-Matczak, E.; Stasiowski, M.; Gajda, M.;  
851 Wójkowska-Mach, J. Colonization and Healthcare-Associated Infection of Carbapenem-  
852 Resistant Enterobacteriaceae, Data from Polish Hospital with High Incidence of  
853 Carbapenem-Resistant Enterobacteriaceae, Does Active Target Screening Matter?  
854 *Microorganisms* **2023**, *11* (2). <https://doi.org/10.3390/MICROORGANISMS11020437>.
- 855 (38) Ferreira, R. L.; da Silva, B. C. M.; Rezende, G. S.; Nakamura-Silva, R.; Pitondo-Silva, A.;  
856 Campanini, E. B.; Brito, M. C. A.; da Silva, E. M. L.; Freire, C. C. de M.; Cunha, A. F. da;  
857 Pranchevicius, M.-C. da S. High Prevalence of Multidrug-Resistant *Klebsiella*  
858 *Pneumoniae* Harboring Several Virulence and  $\beta$ -Lactamase Encoding Genes in a

- 859 Brazilian Intensive Care Unit. *Frontiers in Microbiology* **2019**, 9.  
860 <https://doi.org/10.3389/fmicb.2018.03198>.
- 861 (39) Kernéis, S.; Lucet, J. C.; Santoro, A.; Meschiari, M. Individual and Collective Impact of  
862 *Klebsiella Pneumoniae* Carbapenemase (KPC)-Producing *K. Pneumoniae* in Patients  
863 Admitted to the ICU. *J Antimicrob Chemother* **2021**, 76 (Suppl 1), I19–I26.  
864 <https://doi.org/10.1093/JAC/DKAA494>.
- 865 (40) Dirar, M. H.; Bilal, N. E.; Ibrahim, M. E.; Hamid, M. E. Prevalence of Extended-Spectrum  
866  $\beta$ -Lactamase (ESBL) and Molecular Detection of *Bla* TEM, *Bla* SHV and *Bla* CTX-M  
867 Genotypes among Enterobacteriaceae Isolates from Patients in Khartoum, Sudan. *Pan Afr*  
868 *Med J* **2020**, 37, 1–11. <https://doi.org/10.11604/PAMJ.2020.37.213.24988>.
- 869 (41) Pavez, M.; Troncoso, C.; Osses, I.; Salazar, R.; Illesca, V.; Reydet, P.; Rodríguez, C.;  
870 Chahin, C.; Concha, C.; Barrientos, L. High Prevalence of CTX-M-1 Group in ESBL-  
871 Producing Enterobacteriaceae Infection in Intensive Care Units in Southern Chile. *Braz J*  
872 *Infect Dis* **2019**, 23 (2), 102–110. <https://doi.org/10.1016/I.BJID.2019.03.002>.
- 873 (42) Camargo, C. H.; Yamada, A. Y.; Souza, A. R. de; Reis, A. D.; Santos, M. B. N.; Assis, D. B.  
874 de; Carvalho, E. de; Takagi, E. H.; Cunha, M. P. V.; Tiba-Casas, M. R. Genomic Diversity  
875 of NDM-Producing *Klebsiella* Species from Brazil, 2013–2022. *Antibiotics* **2022**, 11 (10),  
876 1395. <https://doi.org/10.3390/antibiotics11101395>.
- 877 (43) Vivas, R.; Dolabella, S. S.; Barbosa, A. A. T.; Jain, S. Prevalence of *Klebsiella Pneumoniae*  
878 Carbapenemase - and New Delhi Metallo-Beta-Lactamase-Positive *K. Pneumoniae* in  
879 Sergipe, Brazil, and Combination Therapy as a Potential Treatment Option. *Revista da*  
880 *Sociedade Brasileira de Medicina Tropical* **2020**, 53. [https://doi.org/10.1590/0037-8682-0064-](https://doi.org/10.1590/0037-8682-0064-2020)  
881 [2020](https://doi.org/10.1590/0037-8682-0064-2020).
- 882 (44) Belouad, E. M.; Benaissa, E.; El Mrimar, N.; Bssaibis, F.; Maleb, A.; Elouennass, M.  
883 Predominance of OXA-48 Carbapenemase-Producing Enterobacterales in a Moroccan  
884 Hospital. *Int J Microbiol* **2023**, 2023. <https://doi.org/10.1155/2023/8581883>.

- 885 (45) Magagnin, C. M.; Rozales, F. P.; Antochévis, L.; Nunes, L. S.; Martins, A. S.; Barth, A. L.;  
886 Sampaio, J. M.; Zavascki, A. P. Dissemination of Bla OXA-370 Gene among Several  
887 Enterobacteriaceae Species in Brazil. *Eur J Clin Microbiol Infect Dis* **2017**, *36* (10), 1907–  
888 1910. <https://doi.org/10.1007/S10096-017-3012-X>.
- 889 (46) Evans, B. A.; Amyes, S. G. B. OXA  $\beta$ -Lactamases. *Clin Microbiol Rev* **2014**, *27* (2), 241–263.  
890 [https://doi.org/10.1128/CMR.00117-13/ASSET/DF7BB1F6-F6E8-4208-8829-](https://doi.org/10.1128/CMR.00117-13/ASSET/DF7BB1F6-F6E8-4208-8829-B01CD28A0242/ASSETS/GRAPHIC/ZCM9990924610006.JPEG)  
891 [B01CD28A0242/ASSETS/GRAPHIC/ZCM9990924610006.JPEG](https://doi.org/10.1128/CMR.00117-13/ASSET/DF7BB1F6-F6E8-4208-8829-B01CD28A0242/ASSETS/GRAPHIC/ZCM9990924610006.JPEG).
- 892 (47) Shahid, M.; Ahmad, N.; Saeed, N. K.; Shadab, M.; Joji, R. M.; Al-Mahmeed, A.; Bindayna,  
893 K. M.; Tabbara, K. S.; Dar, F. K. Clinical Carbapenem-Resistant Klebsiella Pneumoniae  
894 Isolates Simultaneously Harboring Bla NDM-1, Bla OXA Types and QnrS Genes from the  
895 Kingdom of Bahrain: Resistance Profile and Genetic Environment. *Front Cell Infect*  
896 *Microbiol* **2022**, *12*. <https://doi.org/10.3389/FCIMB.2022.1033305>.
- 897 (48) Manandhar, S.; Zellweger, R. M.; Maharjan, N.; Dongol, S.; Prajapati, K. G.; Thwaites, G.;  
898 Basnyat, B.; Dixit, S. M.; Baker, S.; Karkey, A. A High Prevalence of Multi-Drug Resistant  
899 Gram-Negative Bacilli in a Nepali Tertiary Care Hospital and Associated Widespread  
900 Distribution of Extended-Spectrum Beta-Lactamase (ESBL) and Carbapenemase-  
901 Encoding Genes. *Ann Clin Microbiol Antimicrob* **2020**, *19* (1), 1–13.  
902 <https://doi.org/10.1186/S12941-020-00390-Y/FIGURES/5>.
- 903 (49) Awosile, B. B.; Agbaje, M.; Adebowale, O.; Kehinde, O.; Omoshaba, E. Beta-Lactamase  
904 Resistance Genes in Enterobacteriaceae from Nigeria. *Afr J Lab Med* **2022**, *11* (1).  
905 <https://doi.org/10.4102/AJLM.V11I1.1371>.
- 906 (50) Han, M. L.; Nang, S. C.; Lin, Y. W.; Zhu, Y.; Yu, H. H.; Wickremasinghe, H.; Barlow, C. K.;  
907 Creek, D. J.; Crawford, S.; Rao, G.; Dai, C.; Barr, J. J.; Chan, K.; Turner Schooley, R.;  
908 Velkov, T.; Li, J. Comparative Metabolomics Revealed Key Pathways Associated with the  
909 Synergistic Killing of Multidrug-Resistant Klebsiella Pneumoniae by a Bacteriophage-

- 910 Polymyxin Combination. *Comput Struct Biotechnol J* **2022**, *20*, 485–495.  
911 <https://doi.org/10.1016/J.CSBJ.2021.12.039>.
- 912 (51) Kumar, A.; Singh, S.; Gupta, S. K.; Kumar, S.; Kumar, S.; Singh, R.; Thakur, L.; Kumar, M.;  
913 Kapil, A.; Kumar, Y.; Kumar, N. Identification of Metabolite Extraction Method for  
914 Targeted Exploration of Antimicrobial Resistance Associated Metabolites of *Klebsiella*  
915 *Pneumoniae*. *Sci Rep* **2022**, *12* (1). <https://doi.org/10.1038/S41598-022-12153-0>.
- 916 (52) Hudson, A. W.; Barnes, A. J.; Bray, A. S.; Ornelles, D. A.; Zafar, M. A. *Klebsiella*  
917 *Pneumoniae* L-Fucose Metabolism Promotes Gastrointestinal Colonization and  
918 Modulates Its Virulence Determinants. *Infect Immun* **2022**, *90* (10).  
919 <https://doi.org/10.1128/IAI.00206-22>.
- 920 (53) Lin, D.; Fan, J. M.; Wang, J.; Liu, L.; Xu, L.; Li, F.; Yang, J.; Li, B. The Fructose-Specific  
921 Phosphotransferase System of *Klebsiella Pneumoniae* Is Regulated by Global Regulator  
922 CRP and Linked to Virulence and Growth. *Infect Immun* **2018**, *86* (8).  
923 <https://doi.org/10.1128/IAI.00340-18>.
- 924 (54) Aminov, R. Metabolomics in Antimicrobial Drug Discovery. *Expert Opinion on Drug*  
925 *Discovery* **2022**, *17* (9), 1047–1059. <https://doi.org/10.1080/17460441.2022.2113774>.
- 926 (55) Kok, M.; Maton, L.; van der Peet, M.; Hankemeier, T.; van Hasselt, J. G. C. Unraveling  
927 Antimicrobial Resistance Using Metabolomics. *Drug Discovery Today* **2022**, *27* (6), 1774–  
928 1783. <https://doi.org/10.1016/j.drudis.2022.03.015>.
- 929 (56) Soni, V.; Wang, Z.; Singh, V. Editorial: Bacterial Metabolomics Approach towards  
930 Antimicrobials and Resistance. *Frontiers in Microbiology* **2023**, *14*.  
931 <https://doi.org/10.3389/fmicb.2023.1222594>.
- 932 (57) Abril, A. G.; Quintela-Baluja, M.; Villa, T. G.; Calo-Mata, P.; Barros-Velázquez, J.; Carrera,  
933 M. Proteomic Characterization of Virulence Factors and Related Proteins in *Enterococcus*  
934 Strains from Dairy and Fermented Food Products. *International Journal of Molecular*  
935 *Sciences* **2022**, *23* (18), 10971. <https://doi.org/10.3390/ijms231810971>.

- 936 (58) Azhar, F.; Busharat, M.; Chaudhary, S. R.; Waheed, Z.; Jamil, M. Metabolomics in Drug  
937 Discovery: Restoring Antibiotic Pipeline. *Asian Pacific Journal of Tropical Biomedicine* **2023**,  
938 *13* (9), 378. <https://doi.org/10.4103/2221-1691.385568>.
- 939 (59) Tsugawa, H.; Cajka, T.; Kind, T.; Ma, Y.; Higgins, B.; Ikeda, K.; Kanazawa, M.;  
940 Vandergheynst, J.; Fiehn, O.; Arita, M. MS-DIAL: Data-Independent MS/MS  
941 Deconvolution for Comprehensive Metabolome Analysis. *Nature Methods* **2015**, *12:6* **2015**,  
942 *12* (6), 523–526. <https://doi.org/10.1038/nmeth.3393>.
- 943 (60) Tsugawa, H.; Nakabayashi, R.; Mori, T.; Yamada, Y.; Takahashi, M.; Rai, A.; Sugiyama,  
944 R.; Yamamoto, H.; Nakaya, T.; Yamazaki, M.; Kooke, R.; Bac-Molenaar, J. A.; Oztolan-  
945 Erol, N.; Keurentjes, J. J. B.; Arita, M.; Saito, K. A Cheminformatics Approach to  
946 Characterize Metabolomes in Stable-Isotope-Labeled Organisms. *Nat Methods* **2019**, *16* (4),  
947 295–298. <https://doi.org/10.1038/S41592-019-0358-2>.
- 948
